# Supplementary material for: Actionable perturbations of damage responses by TCL1/ATM and epigenetic lesions form the basis of T-PLL
Source: PubMed Central journal article supplement (PMC5814445; doi:10.1038/s41467-017-02688-6), 2018-02-15
Supplement: 41467_2017_2688_MOESM1_ESM.pdf [file 41467_2017_2688_MOESM1_ESM.pdf]

**a Cohort of 98 analyzed primary human T-PLL cases according to profiling platforms**

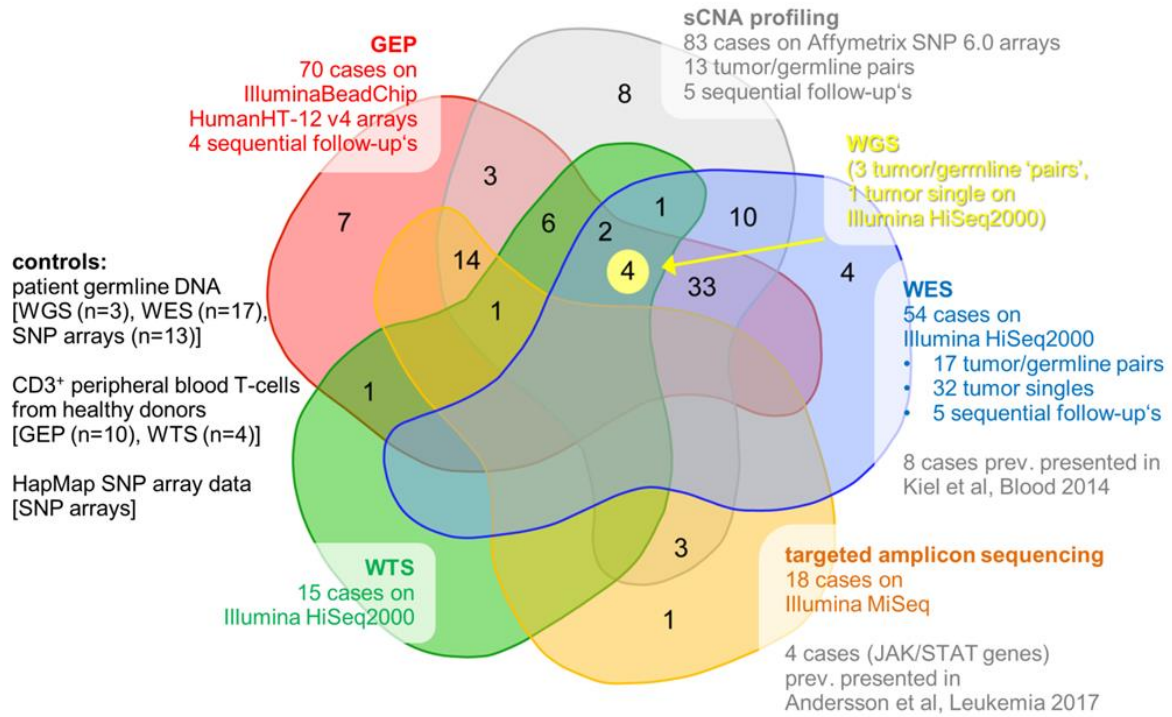

**b Exemplary enrichment representing the 2-step tumor/germline separation strategy**

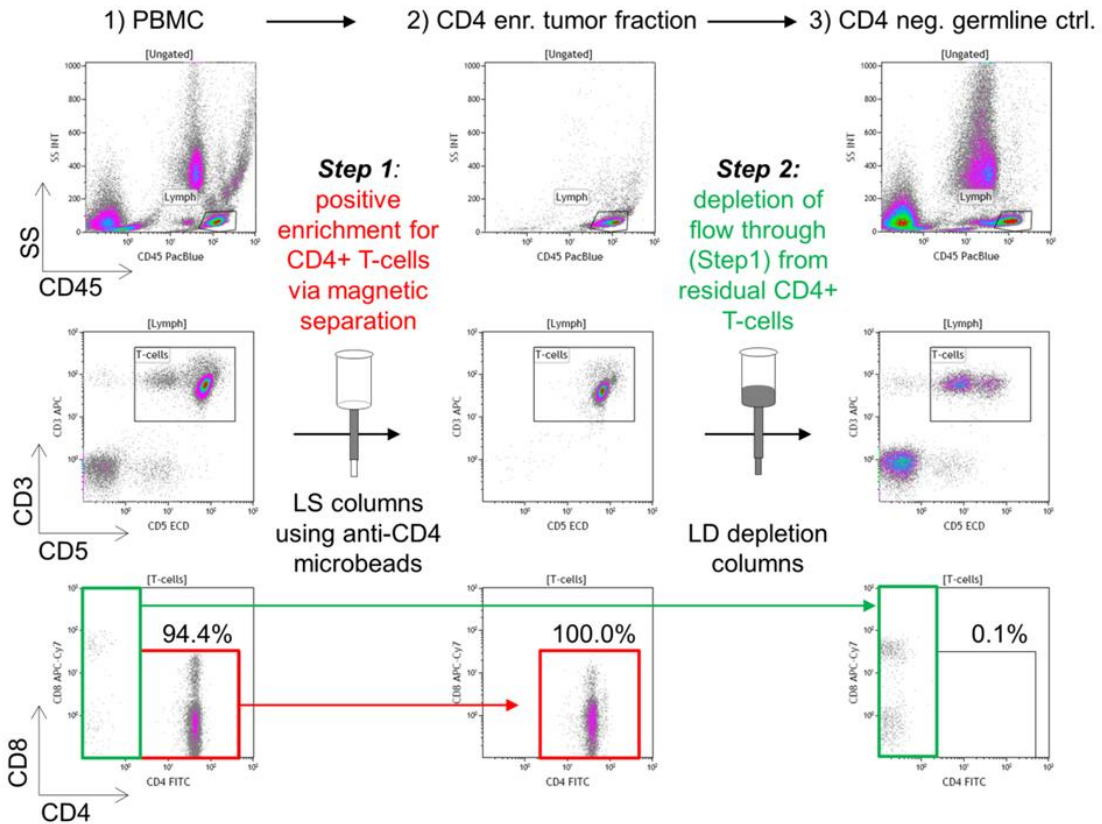

- 1
- 2
- 3
- 4
- 5

**Supplementary Figure 1: Study cohort of 98 T-PLL and controls - platforms and cell isolation**

legend on next page

6 **Supplementary Figure 1: Study cohort of 98 T-PLL and controls - platforms and**  
7 **cell isolation**

8 Note that samples from 98 patients were subjected to genomic analyses, but an  
9 overall of 111 patients were included in this study accounting also for those on which  
10 only *in vitro* experimentation was performed.

11 **a)** Purified T-cells from 98 T-PLL patients (**Supplementary Data 1** for additional  
12 information) were analyzed using various high-throughput profiling platforms (overlap  
13 indicated): Illumina HumanHT-12 v4 BeadChip arrays (n=70 cases) for gene  
14 expression profiling (GEP), Affymetrix SNP 6.0 arrays (n=83 cases) for analysis of  
15 somatic copy-number alterations (sCNAs), and the Illumina HiSeq2000 next-  
16 generation sequencing (NGS) platform. On the latter, whole-genome sequencing  
17 (WGS; n=3 matched pairs of same-patient tumor/germline (t/g) DNA and 1 tumor  
18 single), whole-exome sequencing (WES; n=17 t/g-pairs in addition to n=37 tumor  
19 singles including 5 cases with sequential follow-up (F/U) samples), and whole-  
20 transcriptome sequencing (WTS; n=15 tumors) were performed. Further cases (n=18  
21 tumor 'singles') were analyzed by a customized targeted amplicon sequencing (TAS)  
22 panel including *ATM* (exons 1-63), *JAK1* (exons 9-15), and *JAK3* (exons 10-17)  
23 using the Illumina MiSeq platform and *STAT5B* (exon 16) analyzed via Sanger-  
24 sequencing based methods. CD3<sup>+</sup> pan T-cells isolated from peripheral blood (PB) of  
25 healthy donors with a similar age-median were used as "normal" controls for GEP  
26 (n=10) and for WTS (n=4). For sCNA profiling patient-derived germline control DNA  
27 from 13 t/g pairs of the 83 cases) were used as a pooled reference alone or in  
28 combination with publically available HapMap data sets (<http://hapmap.ncbi.nlm.nih.gov/>).  
29

30 **b)** The isolation strategy of PB tumor cells and matched same-sample germline  
31 controls from PB mononuclear cells (PBMCs) of T-PLL patients employed a two-step  
32 magnetic separation (MACS columns) process (shown is case TP010). (1) Positive  
33 enrichment of T-PLL tumor cells: magnetic beads bound to anti-CD4 or anti-CD8  
34 antibodies (Microbeads, Miltenyi Biotec) and LS Columns (Miltenyi Biotec) were  
35 used. The specificity of beads was selected according to the individual  
36 immunophenotype. (2) Depletion of residual T-PLL cells from the flow-through  
37 designated as normal control: Depletion Columns (LD, Miltenyi Biotec) were used to  
38 remove residual CD4 or CD8 positive cells from the flow-through obtained from step  
39 1. For further details, see **Methods** section.

40

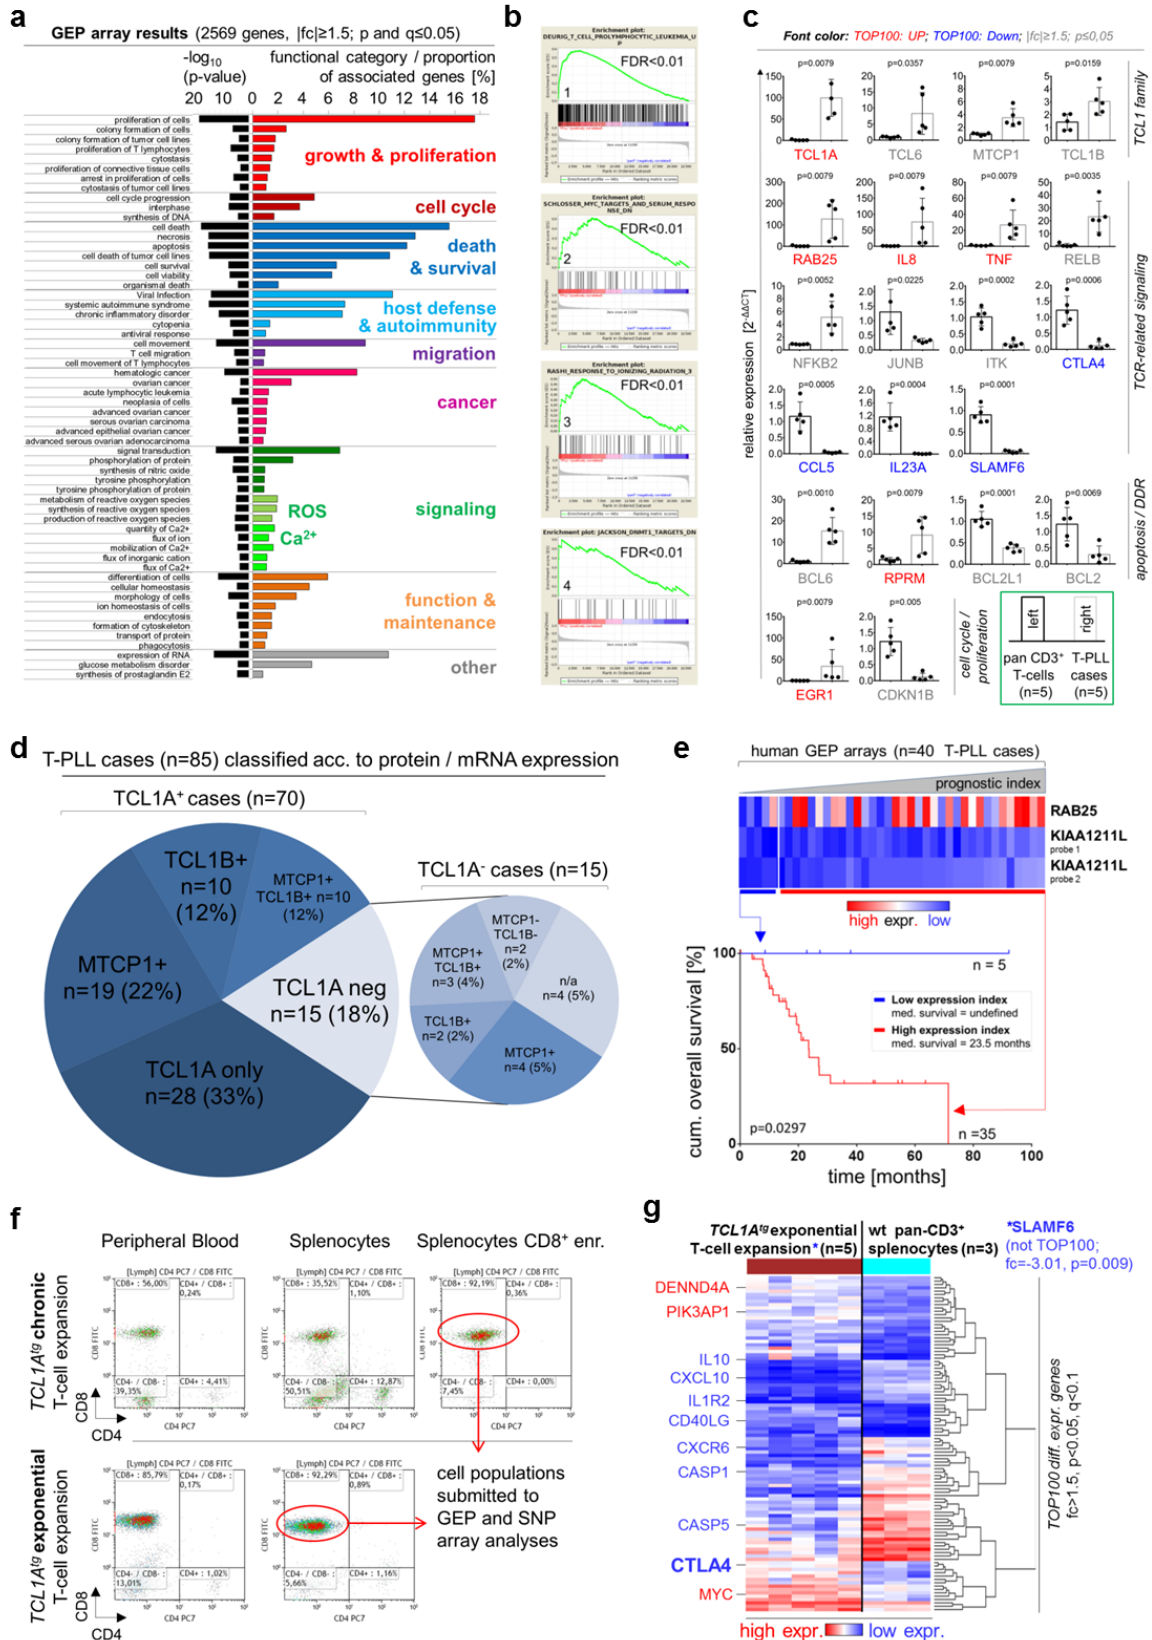

41  
42  
43  
44  
45  
46

**Supplementary Figure 2: Functional annotations of differentially expressed genes in T-PLL with technical (qRT-PCR) and biological (*Lck<sup>pr</sup>-TCL1A<sup>tg</sup>* mice) validations**  
legend on next page

47 **Supplementary Figure 2: Functional annotations of differentially expressed**  
 48 **genes in T-PLL with technical (qRT-PCR) and biological (*Lck<sup>pr</sup>-TCL1A<sup>tg</sup>* mice)**  
 49 **validations**

50 **a)** Affiliation of differentially expressed genes (2569 genes;  $|fc| \geq 1.5$ ;  $p \leq 0.05$ ;  $q \leq 0.05$ )  
 51 to functional groups in Ingenuity<sup>®</sup> Pathway Analysis (IPA): proportion of genes [%]  
 52 associated with the respective process in relation to the total number of differentially  
 53 expressed genes and specific p-values (black bars). Gene sets belonging to the  
 54 functional groups of 'growth and proliferation', 'death and survival', 'host defense and  
 55 autoimmunity', or 'ROS/Ca<sup>2+</sup> signaling intermediates' were significantly enriched (see  
 56 **Fig.1a** for a heat map of Top100; **Supplementary Data 2** for all differentially  
 57 expressed genes).

58 **b)** To test whether gene sets previously identified to be deregulated in T-cell  
 59 malignancies or associated with T-PLL are differentially expressed in our set as well,  
 60 we analyzed for overlaps using the Broad Institute's GSEA<sup>1,2</sup> platform in addition to  
 61 general annotations by IPA (FDR<0.01, n=22 gene sets; across all MSigDB gene  
 62 sets). Four examples of identified functional relevance to T-PLL show significant  
 63 enrichments of genes that were: (1) previously associated with T-PLL  
 64 (transcriptomes of 8 CD3<sup>+</sup> normal donor-derived PB cell samples vs. 5 T-PLL<sup>3</sup>), (2)  
 65 identified as MYC targets (transcriptional program of lymphocytes in response to  
 66 MYC expression<sup>4</sup>), (3) activated by ionizing radiation regardless of *ATM* status in  
 67 murine lymphoid tissue<sup>5</sup>, and (4) identified to be targets of epigenetic modification  
 68 (microarray analyses of fibroblasts from *DNMT1* knockout mice<sup>6</sup>).

69 **c)** qRT-PCR validations of GEP data, including genes encoding *TCL1* family  
 70 members (for *TCL6* an independent gene status is still controversial<sup>7</sup>), TCR-related  
 71 signaling molecules, and apoptosis-/DDR-associated factors (5 T-PLL vs. CD3<sup>+</sup> pan  
 72 T-cells from PB of 5 healthy donors).

73 **d)** *TCL1* gene family status by protein / mRNA: *TCL1A* and/or *MTCP1* pos. in 90.6%  
 74 (n=77/85) vs. neg. or n/a in 9.4% (8 cases). Of the latter, 2/8 showed elevated  
 75 *TCL1B* expression, 2/8 were negative for all 3 *TCL1* family members, and for 4/8 no  
 76 additional data other than lack of *TCL1A* protein was available (n/a). Genomic data:  
 77 *inv(14)/t(14;14)* present in 87.5% (n=49/56); *t(X;14)* in 7.1% (n=4/56). Suggesting an  
 78 impact of constitutive *MTCP1<sup>p13</sup>* similar to the one by *TCL1A*, there was a  
 79 considerable overlap of differentially expressed genes (e.g. *CTLA4*, *SLAMF6*)  
 80 between *TCL1A*-positive cases and those 4 carrying an *MTCP1*-activating *t(X;14)*.  
 81 Further implicating a 'uniform' transcriptome of T-PLL, the GEPs of the 2 exclusively  
 82 *TCL1B*-positive cases were similar to those of *TCL1A*-positive or *MTCP1*-rearranged  
 83 T-PLL (229 of 412 probes).

84 **e)** Differential clinical course prognosticated by a 2-gene/3-probe expression index at  
 85 the time of diagnosis, given the notion of T-PLL as a disease with a generally short  
 86 survival, but with recognition of rare indolent phases. Rationale: the prognostic  
 87 information by *TCL1A* was derived from high expression levels with rather moderate  
 88 variability (**Figs.1a,b**). Therefore, we performed additional regression modeling  
 89 based on global gene expression changes to more sensitively infer on indolent  
 90 phases or particularly aggressive courses through identification of prognosis-  
 91 associated genes with a wider range of expression. A most informative index of 2

92 differentially expressed genes (*RAB25*, *KIAA1211L*) originated from a learning  
93 cohort. It provided high discriminatory power towards clinical outcome based on  
94 stratified index values in the subsequent test cohort. Top: mRNA levels of *RAB25*  
95 and both *KIAA1211L* probes (*RAB25* or *KIAA1211L* alone of insufficient power) as  
96 the 2 signature genes filtered through regression from the learning-set of T-PLL  
97 subjects (**Methods**). Below: Kaplan-Meier curves as application of the stratified index  
98 to the test cohort discriminating outcome based on low vs. high index values. The  
99 oncogenic RAS GTPase *RAB25* was part of the Top100 T-PLL signature (**Fig.1**,  
100 **Supplementary Data 2**) providing normal-T vs. tumor-cell distinction.

101 **f)** *Lck<sup>pr</sup>-TCL1A<sup>tg</sup>* T-cells and those of age-matched C57BL/6 (wild-type) mice were  
102 enriched from splenic lymphocytes by MACS<sup>®</sup> protocols. Stages: 'chronic phase' (30-  
103 70% tumor cells in PB and spleen, average age 12 months, n=3) and 'exponential  
104 phase' (mean PB lymphocyte doubling time (LDT) 12 days (SEM 0.8); >80% tumor  
105 cells in PB, >90% in spleen, average age 15 months, n=5). Examples for cell  
106 populations submitted to GEP (**Fig.1c**, **Supplementary Fig.2g**) and used in  
107 immunoblots (**Supplementary Fig.6e**).

108 **g)** GEP of *TCL1A*-induced murine T-cell leukemia at 'exponential phase' (enriched  
109 splenic CD8<sup>+</sup> T-cells) using Affymetrix GeneChip Mouse Gene 1.0 ST Arrays.  
110 Purified splenic CD3<sup>+</sup> pan-T-cells isolated from C57BL/6 mice (3 arrays from T-cell  
111 pools of 3 mice each (total n=9) were used as matched controls. Besides the  
112 commonly affected TCR signaling modulators *SLAMF6* and *CTLA4*, we observed an  
113 additional deregulation of T-PLL characteristic oncogenes (e.g. *MYC*) in overt murine  
114 leukemia at the exponential growth phase. See also **Fig.1c** showing the differential  
115 expression of genes in 'chronic-phase' expansions and **Supplementary Data 3**  
116 listing all differentially expressed genes.

117

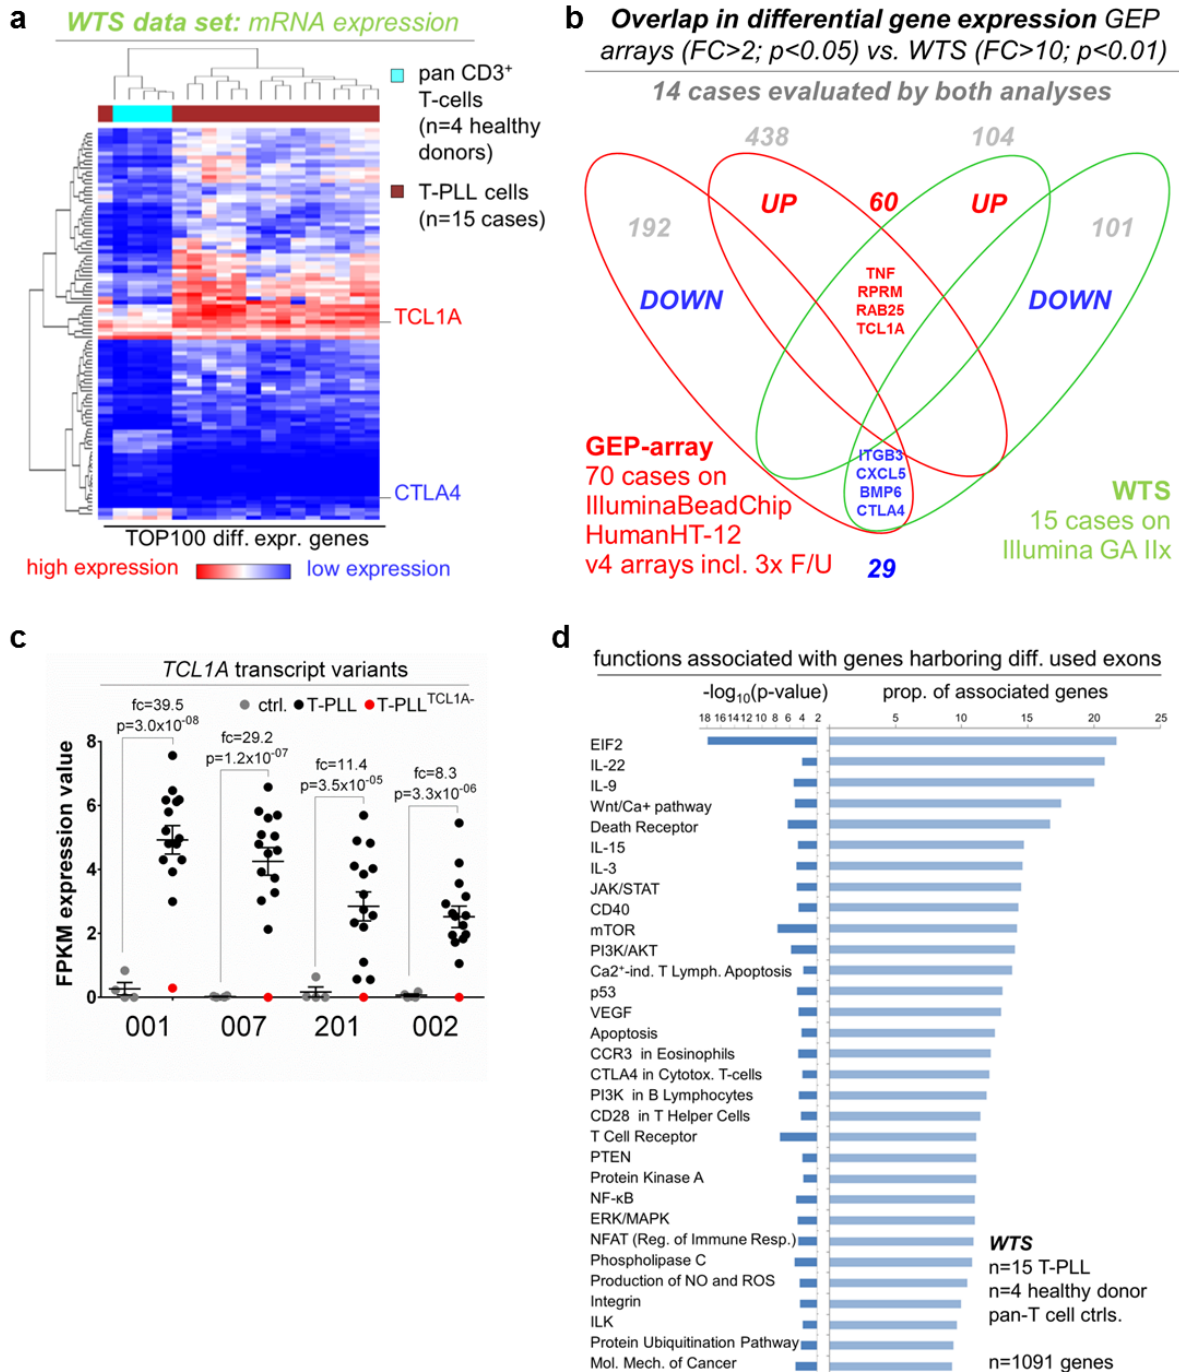

118  
119

120 **Supplementary Figure 3: WTS confirms patterns of differential gene expression**  
121 **and reveals differential exon usage of genes associated with TCR / cytokine**  
122 **signaling and p53 mediated apoptosis**

123 **a)** The Top100 most variably expressed transcripts, based on the comparison of  
124 WTS data from 15 T-PLL to those from CD3<sup>+</sup> pan T-cells isolated from PB of healthy  
125 donors (n=4) are represented in a heat map (compare **Supplementary Data 4**).

126 **b)** Overlap of significantly differentially expressed genes in T-PLL cells as detected  
127 by WTS data (15 T-PLL) vs. GEP arrays (n=70 cases); **Supplementary Data 4** for  
128 further details.

129 **c)** Differential expression of variant *TCL1A* transcripts in primary T-PLL (n=15)  
130 compared to healthy-donor derived CD3<sup>+</sup> T-cells ('ctrl.', n=4) revealed a congruent

131 upregulation of all detected *TCL1A* transcripts in 'TCL1A positive cases' and  
132 identifies high expression of a new shorter *TCL1A* variant (*TCL1A-007*). Red dots for  
133 *TCL1A*-protein negative case. Detected transcripts (p-values as per Student's t-test):  
134 *TCL1A-001* (exons 1, 2, 3; 1,391 bps; 114 aa residues; fc=39.27, p=3.1x10<sup>-8</sup>), a  
135 truncated *TCL1A-007* (exons 2, 3; 980 bps; 53 aa residues; fc=29.2, p=1.2x10<sup>-7</sup>),  
136 *TCL1A-201* (exons 1, 2, 3; 1,395 bps; 114 aa residues; fc=11.4, p=3.4x10<sup>-5</sup>), and  
137 *TCL1A-002* (exons 1, 2, 4; 717 bps; 99 aa residues; fc=8.3, p=3.4x10<sup>-6</sup>). FPKM:  
138 fragments per kilobase of exon per million reads mapped (mean with SEM).  
139 Generally, differential expression of transcripts was assessed using DESeq v1.14.0  
140 by evaluating the expression of respective isoforms through a gapped alignment.  
141 **d)** Differential exon usage (DEU) as alternative splicing, evaluated via DEXSeq  
142 v1.16.0, provides a descriptive assessment of whether the particular exon bins  
143 (containing merged exons for ORF overlaps of multiple genes) are rather retained or  
144 skipped. It also includes corrections for potential biases through differential  
145 expression. Here, differentially spliced genes (see **Supplementary Data 5**, FDR  
146 cutoff q<0.01) identified by comparing WTS data of primary T-PLL cells (n=15) to  
147 healthy-donor T-cells (n=4) were associated with TCR / cytokine signaling and p53  
148 mediated apoptosis, as evaluated by ConsensusPathDB.  
149

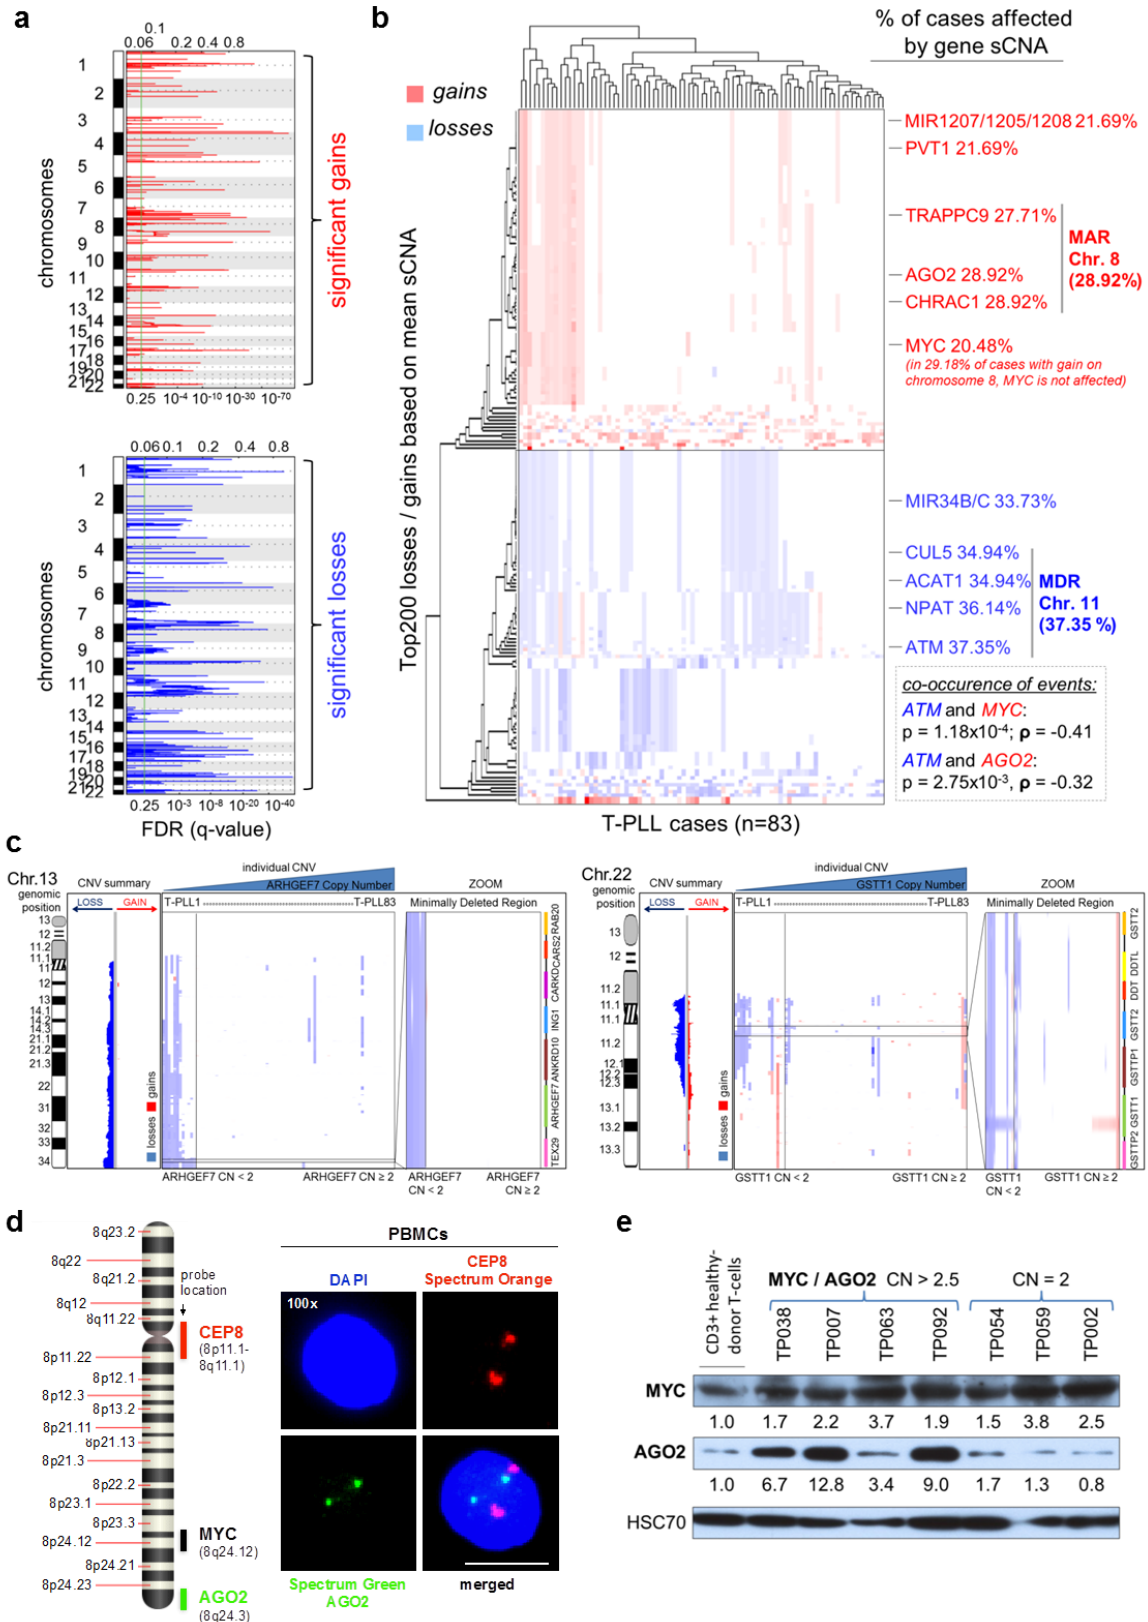

150  
151  
152  
153  
154

**Supplementary Figure 4: Lesions identified in sCNA profiling dominantly include losses at chr.11 (*ATM*) and novel gains located on chr.8 (*AGO2*)**  
legend on next page



155 **Supplementary Figure 4: Lesions identified in sCNA profiling dominantly**  
156 **include losses at chr.11 (*ATM*) and novel gains located on chr.8 (*AGO2*)**

157 Globally, we identified gains (CN>2.5) in 19,590 genes and losses (CN<1.5) in  
158 27,193 genes (**Supplementary Data 7**). The number of sCNA-affected genes  
159 (median 3354) varied inter-individually (e.g. 13,862 in TP038 vs. 42 in TP033).

160 **a)** GISTIC2.0<sup>8</sup> analyses showing significant gains and losses in 83 T-PLL compared  
161 to 13 patient-derived normal DNAs confirmed the enrichment of lesions on chr.8 and  
162 chr.11 (compare **Supplementary Data 6** and **Fig.2b**). Among the genes that exhibit  
163 both focal gains and deletions (centers of wide peaks) at 90%-confidence level are  
164 *GSTM1* (*Glutathione S-Transferase Mu 1*; chr.1; CN=2.57) and *LCE3C* (*Late*  
165 *Cornified Envelope 3C*; chr.1; CN=1.64), which are also likely due to complex  
166 rearrangements.

167 **b)** Heat map showing the color-coded CN of Top200 gained / lost genes (CN mean  
168 across all T-PLL; red: CN>2.5; blue: CN<1.5). Genes characterizing the minimally  
169 amplified region (MAR) on chr.8 and the minimally deleted region (MDR) on chr.11  
170 (see **Fig.2c**), were affected at the highest frequencies of CN events (in %; compare  
171 **Supplementary Data 7**). Chr.11 MDR: Slightly less frequently involved than *ATM*  
172 were the cell cycle factor *NPAT*, the mitochondrial acetyltransferase *ACAT1*, and the  
173 Ras ubiquitin ligase *CUL5*. Chr.8 MAR: *AGO2* is more frequently overrepresented  
174 than *MYC*.

175 **c)** MDRs on chr.13 (left) and chr.22 (right) (supplementing data to **Fig.2b,c**) showing  
176 restrictions to *GSTT1* (glutathione S-transferase theta 1, lost in 24.1% of cases) and  
177 *ANKRD10/ARHGEF7* (ankyrin repeat domain 10 / Rho guanine nucleotide exchange  
178 factor, lost in 15.7% of cases), respectively (average CN=1.91 / 1.82).

179 **d)** Verification of biallelic *AGO2* in healthy donor derived PBMCs using FISH (scale  
180 bar =5µm; control to the FISH analyses of **Fig.2d**).

181 **e)** Immunoblots on primary human T-PLL cells, n=7 cases (*MYC*; *AGO2*), and CD3<sup>+</sup>  
182 pan T-cells from PB of healthy donors. Quantifications according to HSC70 loading  
183 control via ImageJ<sup>®</sup>. Protein expression of *MYC* was independent of the presence of  
184 the respective sCNA lesion, e.g. showing *MYC* upregulation in CN-biallelic cases.  
185 Markedly elevated *AGO2* expression was restricted to the cases with CN>2.5.

186

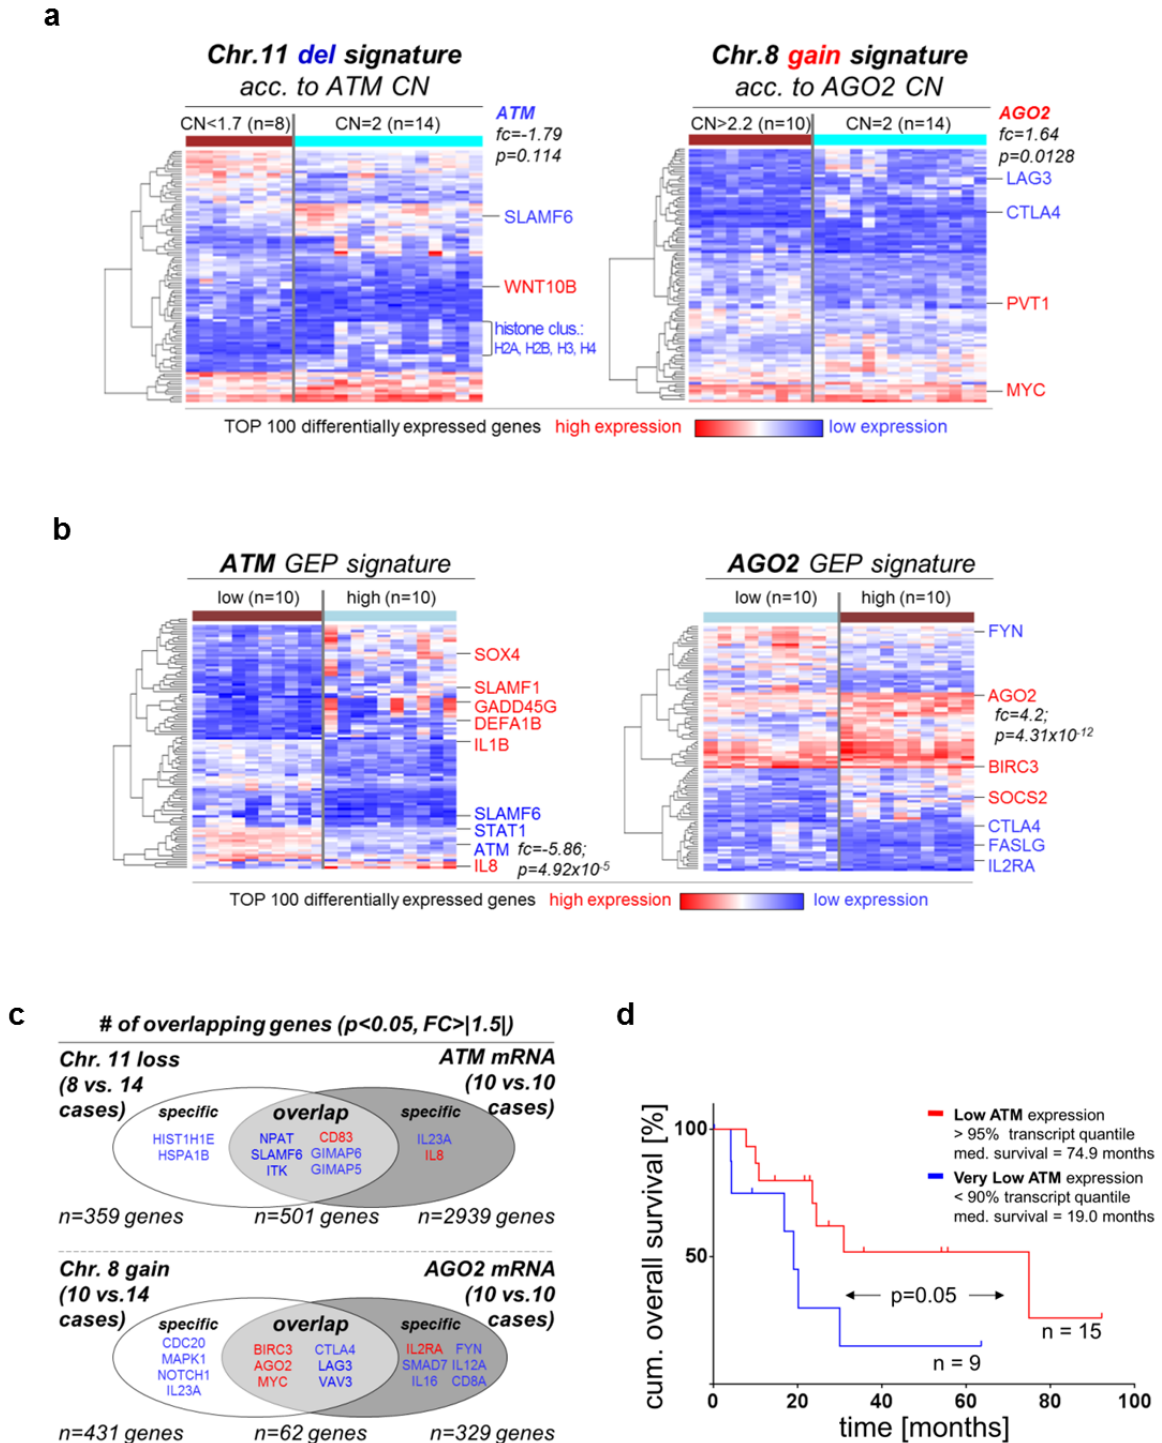

187

188

189 **Supplementary Figure 5: Gene expression signatures associated with specific**  
 190 **sCNAs or with cases defined by stratified expression of respectively affected**  
 191 **genes**

192 Despite a considerable co-occurrence of the sCNAs at chr.11 (MDR) and at chr.8  
 193 (MAR) per case (OR=3.89; p=0.002, Fisher's exact test; see **Supplementary**  
 194 **Fig.10d** for details), there was a sizable fraction of T-PLL with discordance between  
 195 the presence of these sCNAs, i.e. 35% of cases with an *ATM* loss did not harbor an  
 196 *AGO2* gain.

197 **a)** Heat maps showing the differential expression (Top100) of genes specifically  
 198 associated with chr.11 MDR and with chr.8 MAR. For that, GEPs of cases carrying  
 199 losses at chr.11 were compared to cases 'biallelic' for chr.11 (*ATM* CN<1.7 vs. CN=2  
 200 according to comparison to HapMap controls; chr.8 affected cases excluded) and  
 201 GEPs of cases with chr.8 gains were compared to cases 'biallelic' for chr.8 (*AGO2*  
 202 CN>2.2 vs. CN=2 according to comparison to HapMap controls; chr.11 affected  
 203 cases excluded). Among the genes that 'defined' the global differences of T-PLL cells  
 204 to normal T-cells regardless of sCNA status (see **Fig.1a**) some were specifically  
 205 associated with these prominent sCNAs (i.e. *SLAMF6* downregulation with presence  
 206 of the chr.11 MDR and *CTLA4* downregulation with chr.8 gains (MAR);  
 207 **Supplementary Data 8** for additional information). These MDRs/MARs are  
 208 associated with intuitive fold-changes (fc) of expression of their defining genes, *ATM*  
 209 and *AGO2*, respectively.

210 **b)** Heat maps showing the differential expression (Top100) of genes specifically  
 211 associated with stratified *ATM* and *AGO2* mRNA abundance; comparison: 10 T-PLL  
 212 with highest vs. 10 cases with lowest expression (fc of *ATM* and *AGO2* expression  
 213 indicated). *AGO2* mRNA levels were significantly elevated in cases with lowest *ATM*  
 214 levels (fc=1.73; p=0.02, Student's t-test), while the generally low *ATM* expression is  
 215 not different between *AGO2* high vs. low cases. Interestingly, very low *ATM* mRNA  
 216 levels were accompanied by an enriched deregulated expression of other DDR-  
 217 associated genes, exemplified by *RAD50* or *FOXO3* (**Supplementary Data 9**).

218 As expected, T-PLL with lowest expression levels of *ATM* or highest expression  
 219 levels of *AGO2* were enriched for those cases affected by CN lesions of the chr.11  
 220 MDR or the chr.8 MAR, respectively. *ATM*<sup>low</sup> vs. *ATM*<sup>high</sup>: chr.11 MDR in 8 of the 10  
 221 cases with lowest *ATM* expression vs. 1 of the 10 cases with highest *ATM*  
 222 expression (OR=27.3; p=0.005, q=0.02). *AGO2*<sup>low</sup> vs. *AGO2*<sup>high</sup>: chr.8 MAR in 1 of  
 223 the 10 cases with lowest *AGO2* expression vs. 7 of the 10 cases with highest *AGO2*  
 224 expression (OR=0.05; p=0.02, q=0.08).

225 **c)** Gene expression signatures associated with the presence of chr.8 and chr.11 CN  
 226 lesions (see **a**) were compared to those derived from stratified *ATM* and *AGO2*  
 227 mRNA levels (see **b**). The GEPs of exclusively chr.11- and chr.8-affected cases  
 228 appeared to be determined to a large degree by the minimal-region defining genes  
 229 *ATM* and *AGO2*, based on marked overlap of GEPs: 501 of 860 differentially  
 230 expressed genes associated with the chr.11 MDR are likewise associated with  
 231 altered *ATM* mRNA expression; 62 of 493 differentially expressed genes associated  
 232 with chr.8 aberrations are likewise associated with altered mRNA *AGO2* expression.  
 233 Together, both frequent sCNAs and the respectively altered expression of their  
 234 defining genes (*ATM*, *AGO2*) are associated with unique and joint signatures, but  
 235 overall with a large number of genes that displayed the most differential expression  
 236 (vs. normal T-cells) in the entire cohort of T-PLL (not stratified by any sCNA, **Fig.1a**),  
 237 i.e. *CD83*, *SLAMF6*, *GIMAPs*, *CTLA4*, or *MYC*. Overall, this highlights gene-specific  
 238 and region-defined contributions to the overall GEP of T-PLL (**Supplementary Data**  
 239 **8, 9**).

240 **d)** Shorter overall survival of T-PLL subjects with lower *ATM* mRNA expression (GEP  
 241 arrays, 5% quantile 'buffer; log-rank test).

242

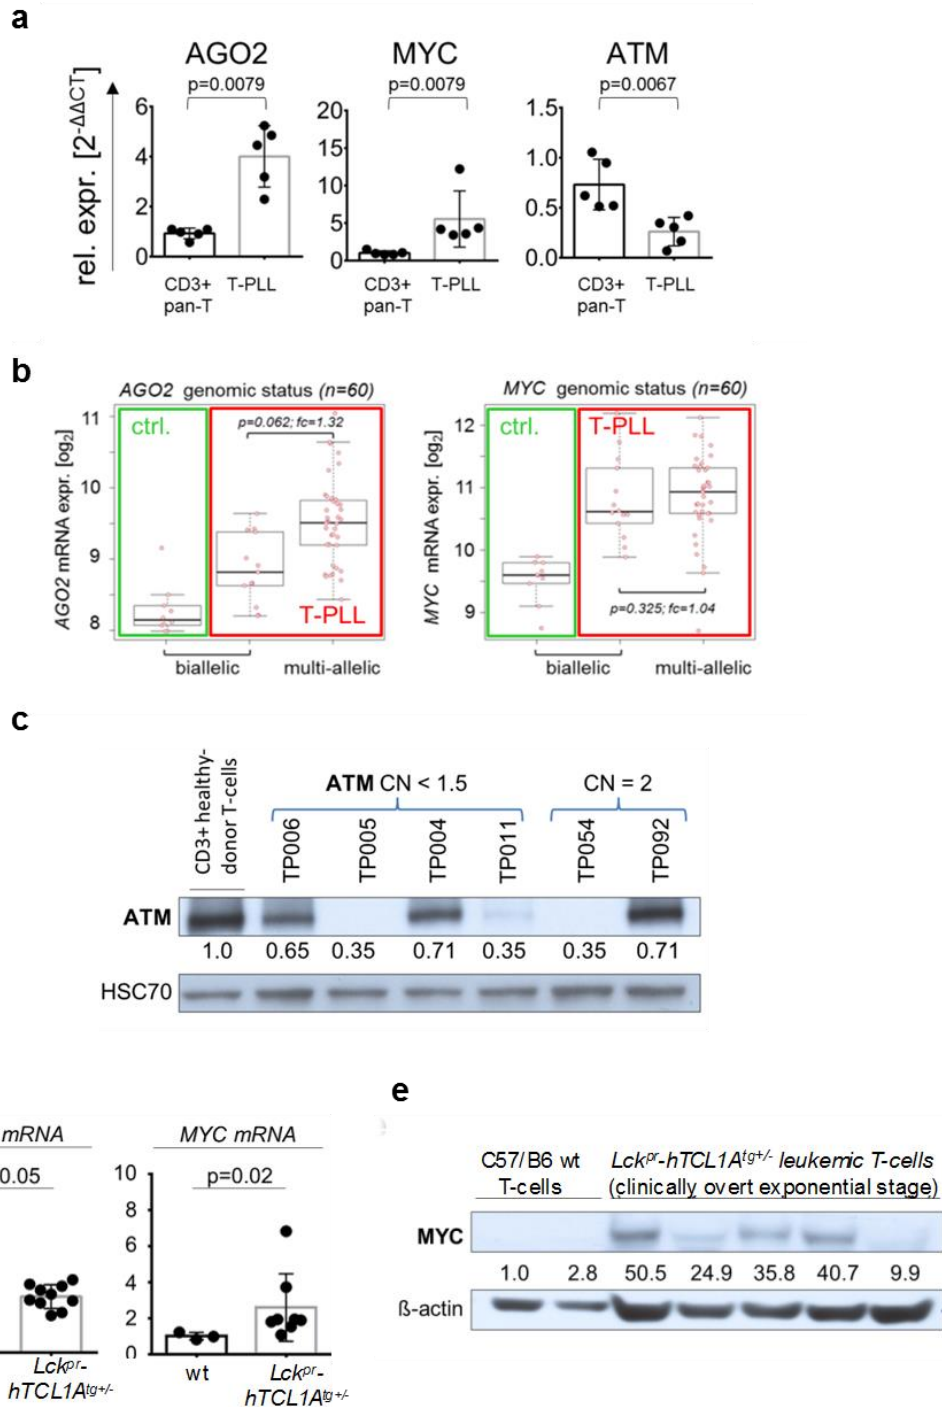

243

244

245 **Supplementary Figure 6: Changes in transcript and protein abundance of ATM**  
 246 **and MYC are not entirely explained by somatic CNA events on chr.11 and chr.8,**  
 247 **respectively**

248 **a-c)** Although the genes affected by the chr.11 MDR / chr.8 MAR showed decreased  
 249 (*ATM*) and increased (*AGO2*, *MYC*) expression (array-based, qRT-PCR,  
 250 immunoblots), this was rather generally disease-associated than confined to the  
 251 presence of the specific genomic CN lesion (see also **Supplementary Fig.7**).

252 **a)** qRT-PCR: mRNA expression of *AGO2* and *MYC* was generally upregulated, while  
 253 *ATM* expression was downregulated in primary T-PLL cells ( $n=5$  cases) vs.  $CD3^+$  pan

254 T-cells isolated from PB of healthy donors (n=5); compare GEP data in  
 255 **Supplementary Data 2.**

256 **b)** mRNA expression values [log2] of *MYC* and *AGO2* derived from GEP analyses in  
 257 CD3<sup>+</sup> pan T-cells isolated from healthy donors (green box), and T-PLL cases  
 258 stratified as 'AGO2/MYC biallelic', and 'AGO2/MYC multiallelic' (red box) according to  
 259 sCNA profiling (compare **Fig.2** and **Supplementary Data 7**). The fold-change of  
 260 *AGO2* mRNA levels in *AGO2* multi-allelic over -biallelic cases was 1.32 (p=0.062,  
 261 Student's t-test; compare also with **Supplementary Fig.4e**). *MYC* mRNA expression  
 262 seemed to be generally elevated in T-PLL irrespective of the presence of a *MYC*  
 263 gain, pointing to additional mechanisms upregulating *MYC* expression that seem  
 264 independent of genomic amplification. Boxes indicate the interquartile range (IQR).  
 265 The tick line represents the mean, while whiskers reflect the lower and upper limits.  
 266 Lower limit =  $x_{0.25} - 1.5 * IQR$ . Upper limit =  $x_{0.75} + 1.5 * IQR$ .

267 **c)** Immunoblot on human T-PLL cells, n=6, and T-cells from PB of healthy donors.  
 268 Quantifications according to HSC70 loading control via ImageJ<sup>®</sup>. Protein expression  
 269 of ATM was independent of the presence of the respective sCNA lesion, e.g.  
 270 showing absence in CN-biallelic cases like TP054 (carried biallelic *ATM* mutations).

271 **d & e)** Murine TCL1A-driven T-PLL-like expansions generally revealed a lower sCNA  
 272 abundance and recurrence than found in human T-PLL (average 70.7 sCNAs in  
 273 chronic phase (n=3) and 74.8 sCNAs in exponential phase (n=5; CN<1.8 or >2.2)). **d)**  
 274 qRT-PCRs of *ATM* and *MYC* mRNA in splenic T-cells of background-matched wild-  
 275 type and *Lck<sup>Dr</sup>-hTCL1A<sup>tg</sup>* mice reveals a downregulation of *ATM* and an  
 276 upregulation of *MYC* although respective genetic CN lesions are not observed in  
 277 leukemic T-cells of these animals, again pointing at CN-independent modes of  
 278 deregulation (see **Supplementary Fig.2f** for cell enrichment, **Fig.1c**,  
 279 **Supplementary Fig.2g**, and **Supplementary Data 3** for GEP derived mRNA  
 280 expression levels). **e)** *MYC* protein expression in TCL1A-driven murine leukemic T-  
 281 cell expansions: immunoblot of splenic T-cells from background- and age-matched  
 282 wild-type control mice (2 T-cell pools of 3 mice each (total n=6)) and from *Lck<sup>Dr</sup>-*  
 283 *hTCL1A* mice with exponential phase leukemia (for definitions see legend to  
 284 **Supplementary Fig.2**, n=5) corroborated the data on upregulation of *MYC* mRNA in  
 285 the usually *MYC* 'biallelic' murine leukemias (see **Supplementary Fig.2f** for cell  
 286 enrichments) and paralleled the sCNA-independent *MYC* upregulation in human T-  
 287 PLL. Quantification:  $\beta$ -actin ratio via ImageJ<sup>®</sup>.

288

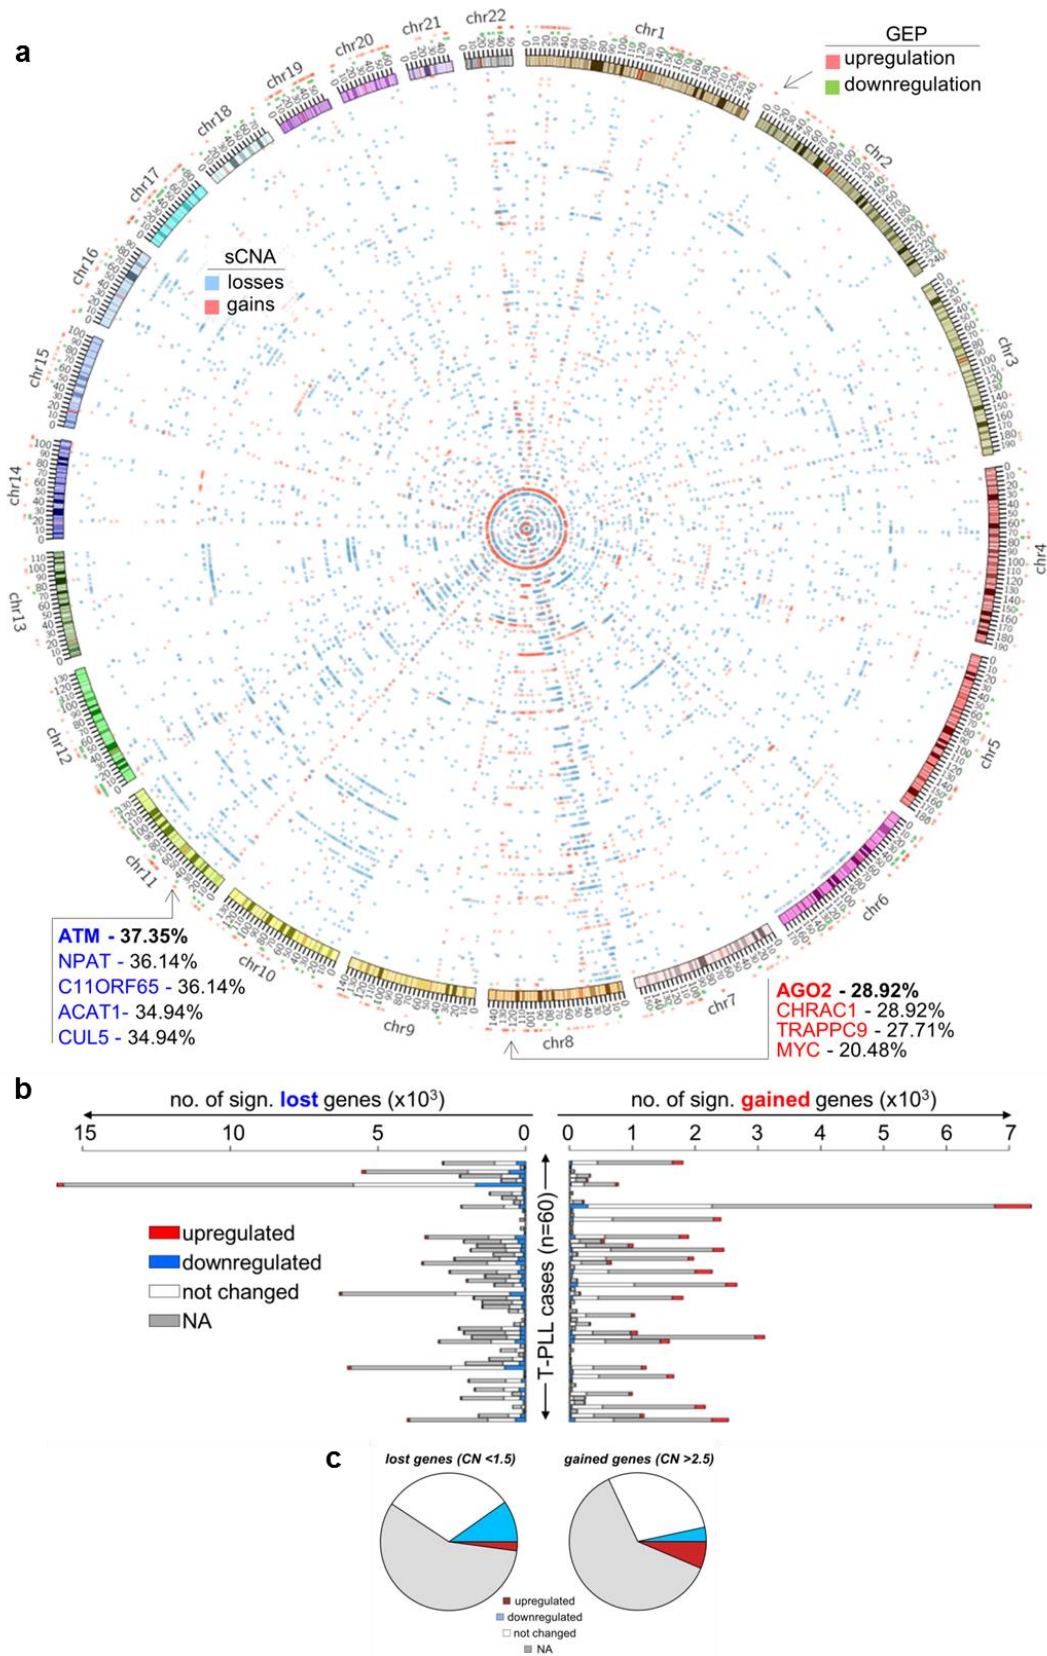

289  
290

291 **Supplementary Figure 7: Associations of large-scale genomic lesions and**  
292 **deregulations of global gene expression in T-PLL**

293 legend on next page

294 **Supplementary Figure 7: Associations of large-scale genomic lesions and**  
295 **deregulations of global gene expression in T-PLL**

296 **a)** Circos plot mapping sCNAs and deregulations of gene expression on  
297 chromosomal loci (%: frequencies of sCNA events across entire T-PLL cohort).

298 **b)** GEPs superimposed on sCNAs with global data per case. CN lesions (exclusively  
299 monoallelic) were correlated with the differential expression of genes located in the  
300 respective regions. Although sCNA-associated changes in GEP were of generally  
301 intuitive directionality, a larger proportion of genes showed no down- / upregulation in  
302 the context of genomic losses / gains.

303 **c)** Summary of b): pie charts illustrating the association of gene-specific sCNA events  
304 with differential expression of genes. For the majority of genes, their transcript  
305 abundance remained unchanged upon losses or gains; a smaller percentage of  
306 sCNA-affected genes show an altered expression intuitively corresponding to the  
307 respective genetic change (combination of GEP and sCNA profiling data; n=60 T-PLL  
308 cases; blue: downregulated; red: upregulated; white: unchanged; grey: not annotated  
309 (N/A)). Again, all sCNA events are monoallelic.

310

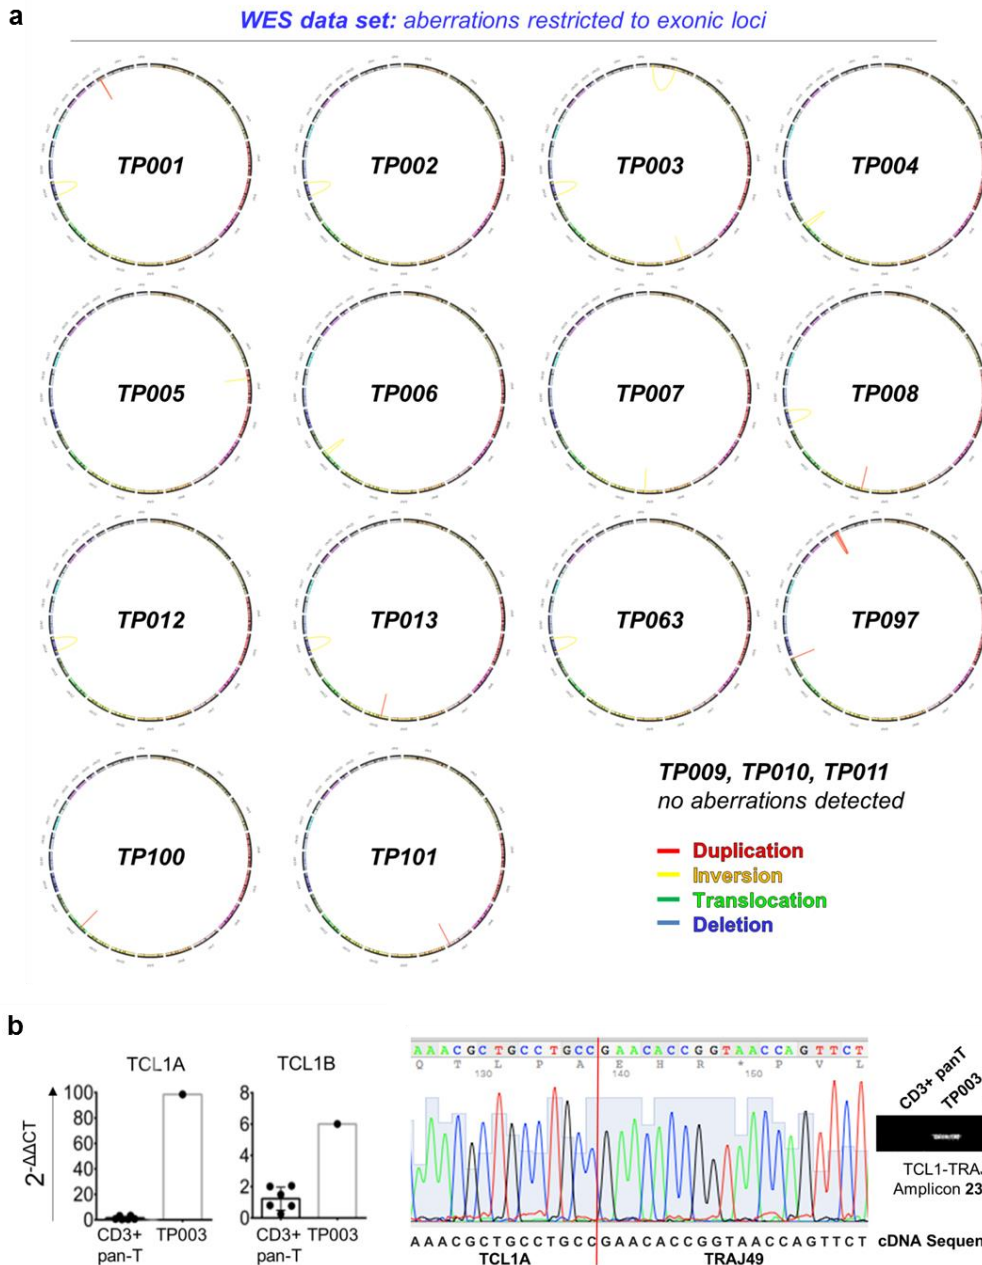

311

312

**Supplementary Figure 8: Novel structural variations (SVs) in T-PLL**

313

**a)** SVs (color-coded inversions / translocations / deletions) detected in exonic regions are mapped to involved chromosomal loci for all T-PLL t/g-pairs analyzed by WES. The data supplement the WGS data of **Fig.3a** (see also **Supplementary Data 10**). Based on the stringent filters applied, tandem-duplications were not detected and no SVs were detected in TP009, TP010, and TP011.

318

**b)** Left: qRT-PCR analysis showing elevated *TCL1A* and *TCL1B* transcript levels in primary T-PLL cells of case TP003 that carried the *TCL1A-TRAJ49* compared to controls (CD3<sup>+</sup> pan T-cells isolated from PB of healthy donors (n=5)). Mid: the fusion transcript was confirmed by Sanger sequencing of cDNA from TP003 (see **Fig.3b** for a schematic representation of the fusion transcript and **Figs.3c,d** for the confirmation of the genomic inv(14) and residual *TCL1A* protein expression). Right: Validation of the fusion transcript *TCL1A-TRAJ49* expression via RT-PCR in case TP003 compared to healthy donor derived T-cells (NTC - 'no template' control).

325



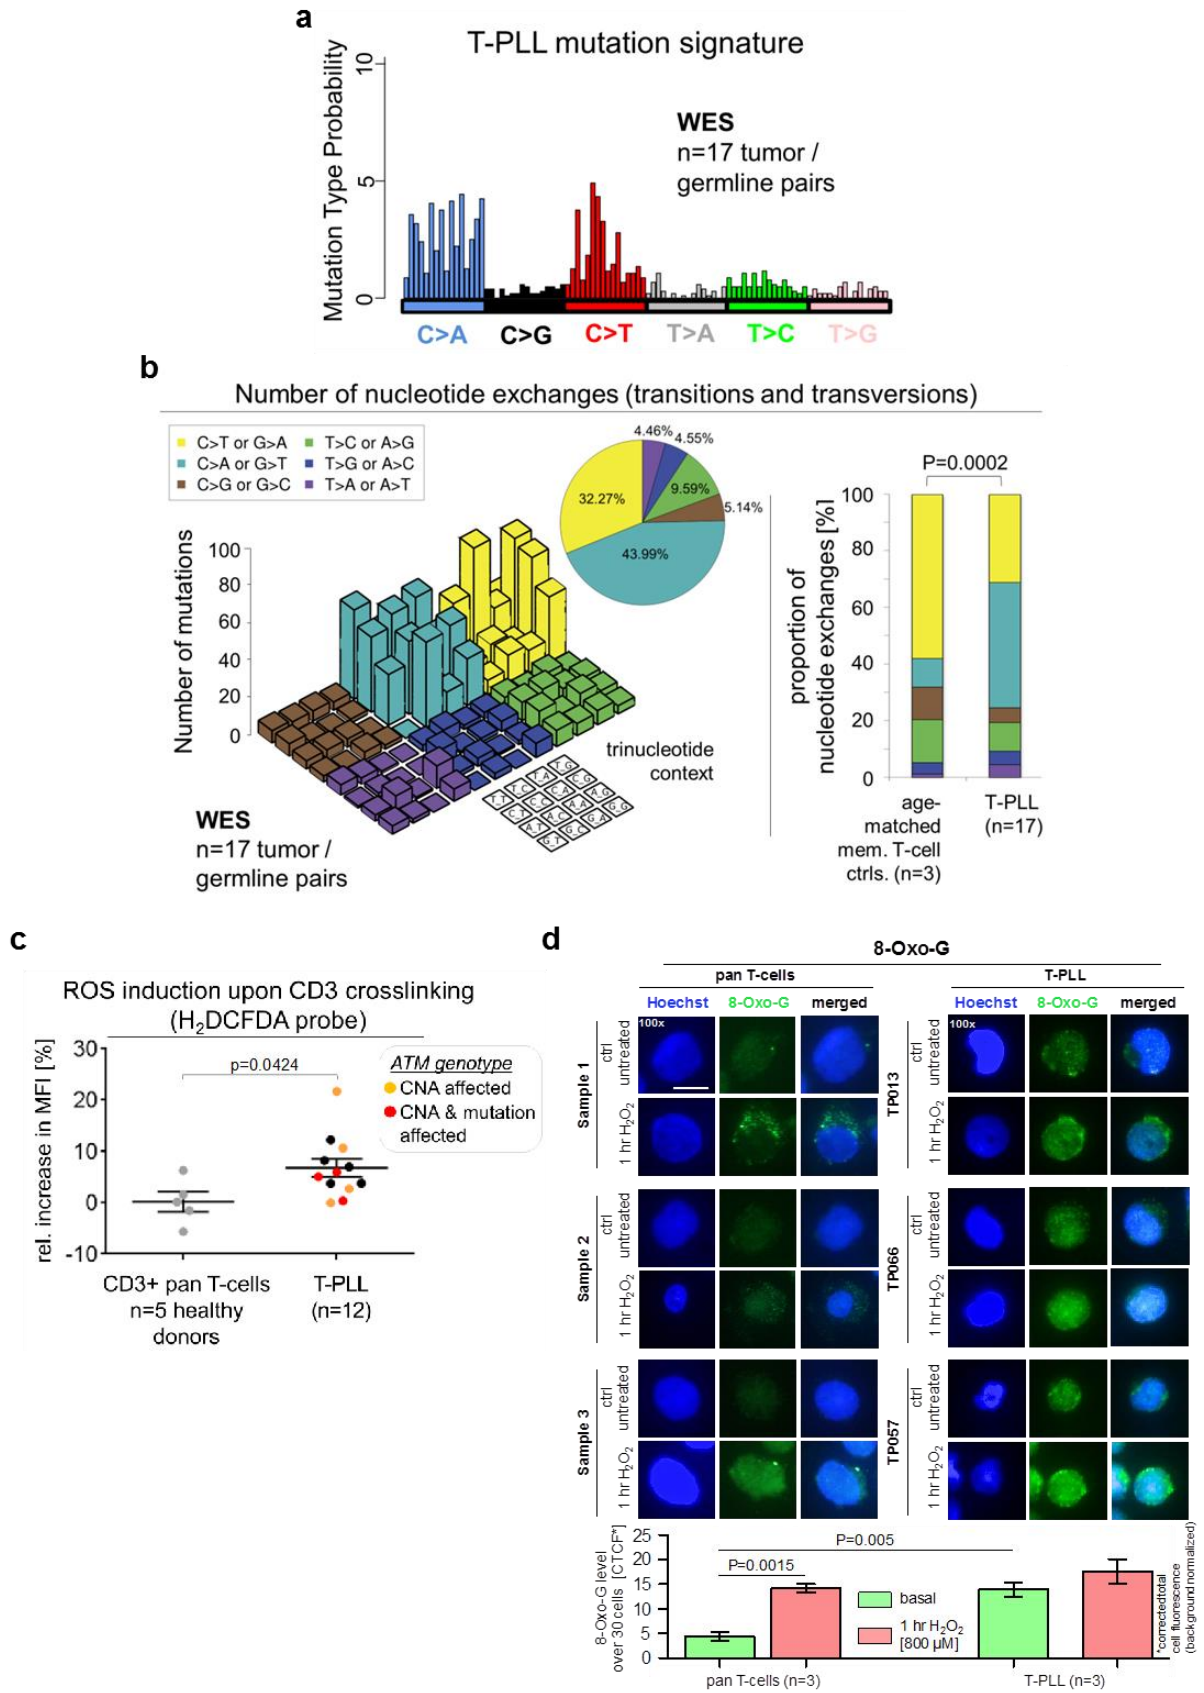

326

327

328 **Supplementary Figure 9: Characteristics of WES detected mutations in T-PLL**

329 legend on next page

330 **Supplementary Figure 9: Characteristics of WES detected mutations in T-PLL**  
 331 We observed a high portion of G>T and C>A transversions indicative for oxidative  
 332 DNA damage (8-oxoguanine (8-oxoG)) lesions) during sample preparation. Thus, we  
 333 applied additional filters similar to the ones used in *Costello et al. 2013*<sup>9</sup> (see  
 334 **Methods** for details). Aberrations of mismatch-repair genes like short nucleotide  
 335 deletions in *MSH3* of case TP002 were not associated with a generally higher  
 336 number of SNVs (compare **Fig.4b**), base-exchange preferences, differences in  
 337 mutation rates by loci, or microsatellite instability. **a)** Mutation signature of T-PLL  
 338 according to Alexandrov and colleagues<sup>10</sup> derived from WES data of 17 t/g-matched  
 339 cases. Comparing the T-PLL specific signature to previously catalogued cancer  
 340 genomes, the Top5 significantly correlated signatures (Spearman correlations) were:  
 341 signature 29 ('tobacco chewing';  $\rho=0.69$ ;  $p=7.07 \times 10^{-15}$ ), signature 1 ('aging';  $\rho=0.65$ ;  
 342  $p=8.86 \times 10^{-13}$ ), signature 18 ('neuroblastoma';  $\rho=0.63$ ;  $p=4.37 \times 10^{-12}$ ), signature 14  
 343 ('smoking';  $\rho=0.62$ ;  $p=2.13 \times 10^{-11}$ ), and signature 19 ('pilocytic astrocytoma';  $\rho=0.59$ ;  
 344  $p=1.21 \times 10^{-10}$ ). For a visualization of those signatures please refer to  
 345 <http://cancer.sanger.ac.uk/cosmic/signatures>. **b)** Left: Lego plot of SNV  
 346 (PopFreq<0.01 or COSMIC-annotated, 8-OxoG corrected) frequencies with  
 347 trinucleotide context and overall percentages in pie chart / stacked columns. C:G>A:T  
 348 (44%) and C:G>T:A (32.3%) transversions represent the largest portions of  
 349 exchanges observed in a di-thymidine (T\_T) context. Right: The global distribution of  
 350 SNV frequencies is significantly different comparing suggestive 'T-cell-aging  
 351 acquired' vs. 'tumor-associated' patterns of mutations ( $p=0.2 \times 10^{-3}$ , Wilcoxon test).  
 352 The WES data of isolated memory T-cells from age-matched healthy donors ( $n=3$ ;  
 353 ages 61, 63, 65 years) were compared to memory T-cell subsets of young donors  
 354 (ages 22, 28, 31 years). Note that the apparent discrepancy of frequency-ranks  
 355 compared to **Fig.4c** is explained by the illustration of medians in main **Fig.4c**  
 356 whereas an illustration of overall frequencies is given here. **c)** 2',7'-  
 357 dichlorodihydrofluorescein diacetate (H<sub>2</sub>DCFDA) based measurements of reactive  
 358 oxygen species (ROS) induction upon T-cell receptor (TCR) activation comparing  
 359 healthy T-cells (grey dots) to primary T-PLL cases (mean with SEM). *ATM* genetic  
 360 status: orange - CN<1.5, no mutation; red - CN<1.5, mutated; black dots - no  
 361 genomic *ATM* status available). Although ROS induction upon CD3/CD28  
 362 crosslinking seems to be independent of the presence of an *ATM* sCNA/mutation,  
 363 there was a generally higher increase of ROS levels in stimulated T-PLL cells  
 364 compared to CD3<sup>+</sup> pan T-cells isolated from PB of healthy donors. This observation  
 365 might be linked (1) to a sub-standard performance of the ROS attenuator *ATM* in T-  
 366 PLL, (2) to the TCR-sensitizer function of *TCL1A*<sup>11</sup>, (3) to *TCL1A*'s effect on  
 367 mitochondrial ROS generation<sup>12</sup> or (4) to other aberrancies such as inefficient buffer  
 368 systems. It fits also well with the relative increase of C:G>A:T exchanges observed  
 369 among all WES-detected SNVs (compare **Supplementary Fig.9b**), which can  
 370 specifically result from ROS induced DNA damage<sup>13</sup>. **d)** Cellular 8-oxoG evaluated by  
 371 IF staining and microscopy with an 8-oxoG specific antibody. Basal levels are higher  
 372 in primary T-PLL cells (right panel) than in healthy-donor derived pan-T-cells (left  
 373 panel;  $p=0.005$ , Student's t-test; data supplementing **Fig.4c**). Whole-cell signals  
 374 (nuclear and mitochondrial, scale bar =5 $\mu$ m) of 8-oxoG were quantified as CTCF  
 375 (corrected total cell fluorescence) values. Specificity is shown by increased CTCF  
 376 values upon 1hr treatment with H<sub>2</sub>O<sub>2</sub> ( $p=0.0015$ , Student's t-test).

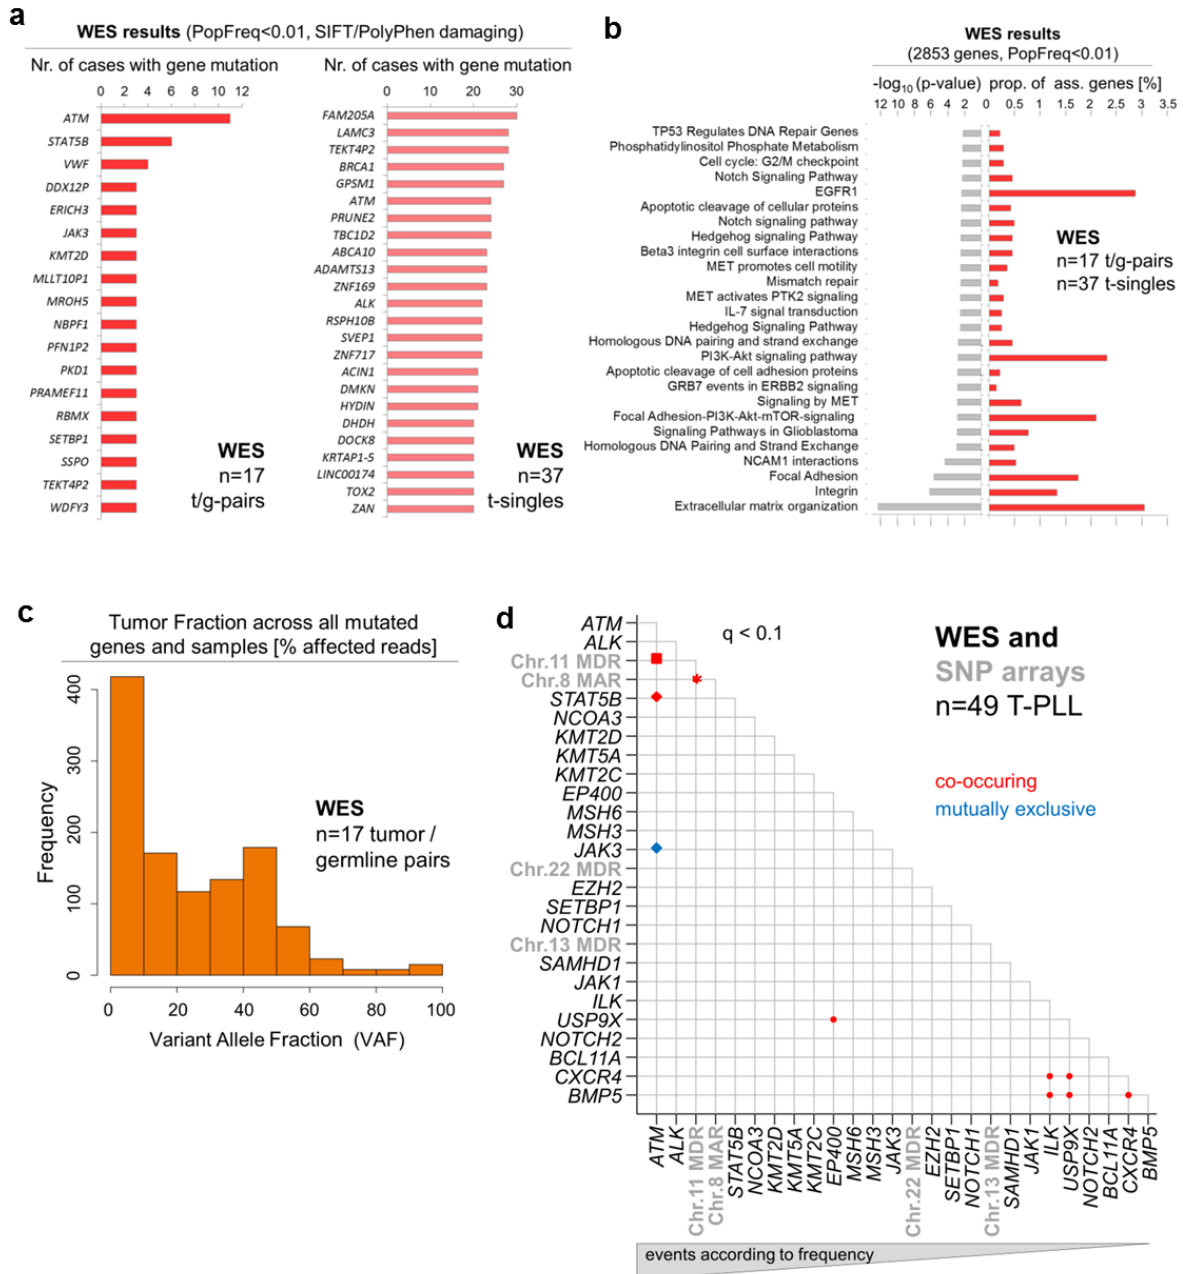

377  
378

379 **Supplementary Figure 10: Functional affiliations and correlations of highly**  
380 **frequent variants**

381 **a)** Lists of genes recurrently mutated with highest frequencies across all analyzed t/g-  
382 pairs and t-singles (only SIFT<sup>14</sup>/PolyPhen2<sup>15</sup> and PopFreq-filtered or COSMIC-  
383 annotated mutations included; compare **Supplementary Data 12** and **Fig.4d** for a  
384 selection of functionally annotated genes).

385 **b)** GSOA from 2853 genes harboring mutations in exonic regions (PopFreq<0.01) as  
386 identified in t/g-pairs and t-singles revealed an overrepresentation of those involved  
387 in p53 mediated DDR, cell cycle regulation, apoptosis, and interleukin signaling.  
388 Proportion of genes [%] associated with the respective process in relation to the total  
389 number of mutated genes (red bars) and specific p-values (grey bars) are given.

390 **c)** Tumor fractions (variant allele fractions, VAFs) of all identified mutations detected  
391 in WES data (% positive reads) according to their overall frequencies (Y-axis). The

392 incidence of mutations showing a 'high clonality' (80-100% tumor fraction) was rather  
393 low (1.4% of all mutations) pointing to a small number of drivers compared to a high  
394 number of subclonal passenger mutations; e.g. 36.6% of all mutated genes have  
395 VAFs of  $\leq 10\%$  (see also **Fig.4e** and **Supplementary Data 12** for tumor fractions of  
396 specific genes).

397 **d)** Correlations of most frequent genomic events were calculated based on distinct  
398 datasets. They were embedded in a primary q-value-matrix with correlations (circle)  
399 estimated by Fisher's exact test with Benjamini-Hochberg FDRs derived from the 49  
400 T-PLL representing the overlap between cases analyzed by SNP arrays and WES.  
401 Star: Associations among sCNAs in the dataset of all 83 SNP-array analyzed T-PLL  
402 revealed a significant co-occurrence of the presence of a chr.8 MAR with the  
403 detection of a chr.11 MDR (OR=3.89;  $p=0.002$ , Fisher's exact test). The case  
404 distribution was as follows: only chr.8 MAR in 10 cases (12%); exclusively chr.11  
405 MDR in 21 cases (25%); co-occurrence of both lesions in 23 cases (28%); none of  
406 both lesions in 29 cases (35%). Thus, when present (54 cases) these lesions  
407 coincide in 42.6% of such cases and are mutually exclusive in 57% of such cases.  
408 Square: The LOH relationship of *ATM* mutations with presence of a chr.11 MDR  
409 (mono-allelic *ATM* deletion) within our data set including TAS und further cytogenetic  
410 information (72 cases due to increased platforms overlap) is reflected by a significant  
411 co-occurrence of both lesions (OR=4.33;  $p=0.0046$ , Fisher's exact test). Diamond:  
412 Among the somatic mutations, we additionally identified a significant co-occurrence  
413 of lesions in *STAT5B* and *ATM*, when using the MuSic mutation relation analysis and  
414 subsequent testing (OR=4.5;  $p=0.045$ , Fisher's exact test). In the extended set of  
415 WES cases ( $n=54$ ), a biased presence of *JAK3* variants in *ATM* unmutated cases  
416 was associated with an OR=0.41 for *JAK3* mutations and *ATM* mutations ( $p=0.098$ ,  
417  $q<0.1$ , Fisher's exact test).

418

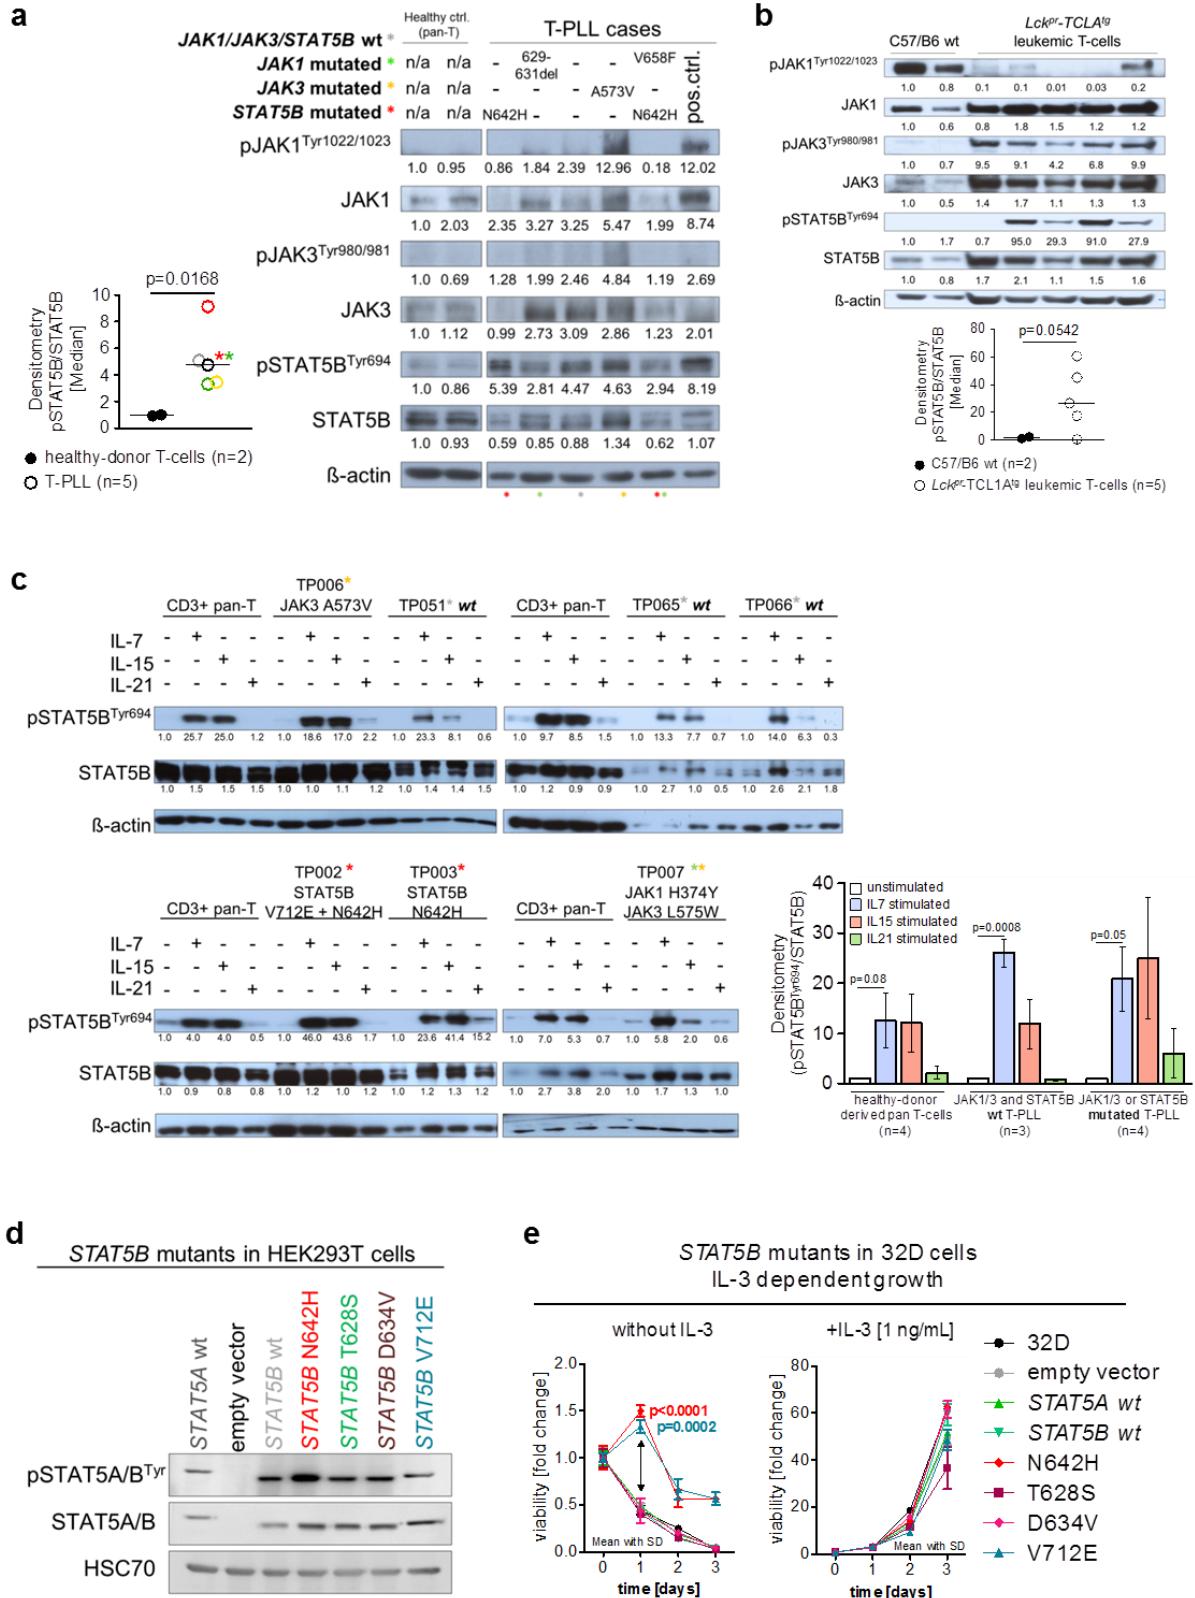

419  
420  
421  
422  
423  
424

**Supplementary Figure 11: Genomic alterations in JAK/STAT signaling pathway components do not predict basal and interleukin-induced JAK/STAT phospho-activation levels, but confer specific pro-survival effects**

legend on next page

425 **Supplementary Figure 11: Genomic alterations in JAK/STAT signaling pathway**  
426 **components do not predict basal and interleukin-induced JAK/STAT phospho-**  
427 **activation levels, but confer specific pro-survival effects**

428 **a)** Immunoblot analysis showing protein levels with basal phosphorylation (activating  
429 motifs) of JAK1, JAK3, and STAT5B in primary T-PLL cells (5 cases) with known  
430 respective gene mutation status. No obvious association of analyzed basal phospho-  
431 activation levels with the presence of a respective mutation. Controls: CD3<sup>+</sup> pan T-  
432 cells isolated from PB of healthy donors (n=2). Lysates from IL-2 stimulated HH cells  
433 represent positive controls. Quantification of immunoblots: ImageJ®, represented as  
434 bar charts (Student's t-test).

435 **b)** Immunoblots for protein levels with phospho-activation status of murine JAK1,  
436 JAK3, and STAT5B motifs (cross-species reactivity of the antibody) in primary  
437 splenic T-cells of *Lck<sup>pr</sup>-hTCL1A* transgenic mice (overt exponential phase, n=5).  
438 Controls: splenic T-cells of genetic-background and age-matched wild-type animals  
439 (2 batches as pools of T-cell isolates from 6 animals (3 each)). Quantifications of  
440 immunoblots: ImageJ®, bar charts, Student's t-test with n=2 for control T-cells.

441 **c)** To model micromilieu mediated conditions via cytokine signaling, healthy donor  
442 derived pan-T-cells (n=4) and primary T-PLL cells with known *JAK1/JAK3/STAT5B*  
443 mutation status (n=7) were exposed *ex vivo* to IL-7, IL-15, and IL-21. Activation was  
444 recorded via phospho-STAT5B<sup>Tyr694</sup> immunoblots. Quantification: ImageJ®,  
445 represented as bar charts, fold-induction upon IL-7 stimulation was compared based  
446 on densitometric quantifications (healthy-donor derived pan-T-cells: 12.6 fold,  
447 p=0.08; *JAK1/3* and *STAT5B* wt T-PLL: 20.9 fold, p=0.0008; *JAK1/3* and *STAT5B*  
448 mutated T-PLL: 20.8 fold, p=0.05, Student's t-tests). The extent of *ex vivo* cytokine-  
449 mediated pSTAT5B induction in *JAK/STAT* mutated T-PLL does not differ from the  
450 one in unmutated cases (IL7: p=0.54, IL15: p=0.42, IL21: p=0.41, Student's t-tests).

451 **d)** Ectopic expression of *STAT5B* mutants in HEK295T cells. Expression and  
452 phosphorylation of STAT5B via immunoblot (n=2 biological replicates; one  
453 representative experiment shown).

454 **e)** Growth of 32D hematopoietic precursor cells and their altered IL-3 dependence  
455 upon expression of *STAT5B* mutants (mean with SEM; p-values relative to the  
456 *STAT5B* wt condition; Student's t-test); n=2 biological replicates with 4 technical  
457 replicates each.

458

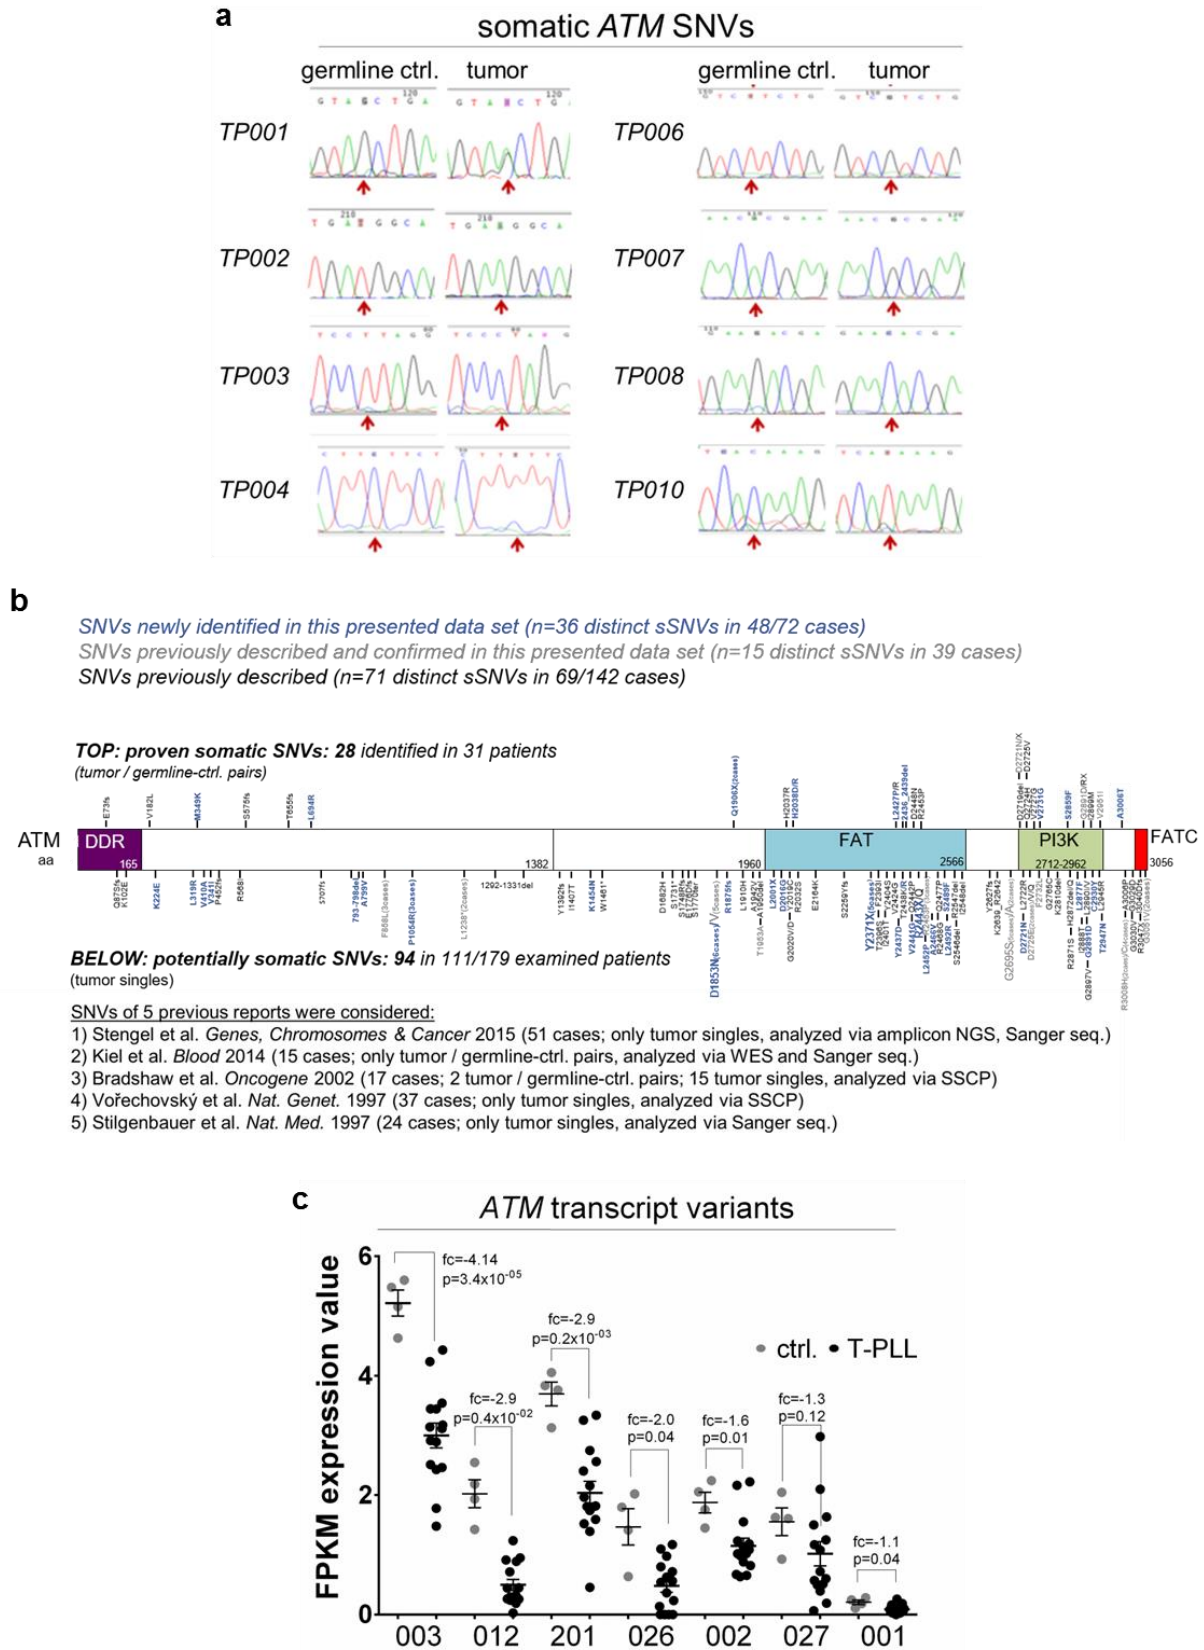

459  
 460  
 461  
 462  
 463

**Supplementary Figure 12: Validations of ATM somatic mutations and clustering of ATM SNVs in the FAT and PI3K domains**  
 legend on next page

464 **Supplementary Figure 12: Validations of ATM somatic mutations and clustering**  
465 **of ATM SNVs in the FAT and PI3K domains**

466 **a)** ATM mutations detected in t/g-pairs by WES are validated by Sanger sequencing.  
467 Eight distinct exemplary SNVs were confirmed as somatic mutations present in 8 T-  
468 PLL (compare **Supplementary Data 12**).

469 **b)** Scheme of the ATM molecule with mapping of mutations identified by WES, TAS,  
470 and Sanger sequencing (i) according to their description in this series vs. previous  
471 publications<sup>16-20</sup> (all published data sets carrying sequencing data on ATM in T-PLL  
472 were selected) and (ii) according to their calling from t/g-pairs (proven somatic, top)  
473 vs. from tumor singles (potentially somatic, bottom). A clustering in the FAT and PI3K  
474 domains (29.2% and 21.4% of all mutations, respectively) is revealed. Compare  
475 **Fig.5a** for a scheme showing ATM SNVs only identified as part of this study. A  
476 dominant missense character of mutations is described, unlike the dominant  
477 truncating mutations identified in A-T individuals<sup>21</sup>.

478 **c)** Differential expression of variant ATM transcripts (WTS analysis) in T-PLL (n=15)  
479 compared to healthy-donor CD3<sup>+</sup> T-cells ('ctrl.', n=4). Confirmed downregulation of  
480 5/7 protein coding ATM variants in T-PLL (fc>|1.5|); those not differentially expressed  
481 are expressed at generally low levels in both, ctrl. and T-PLL (mean with SEM; p-  
482 values as per Student's t-test).

483



**a**

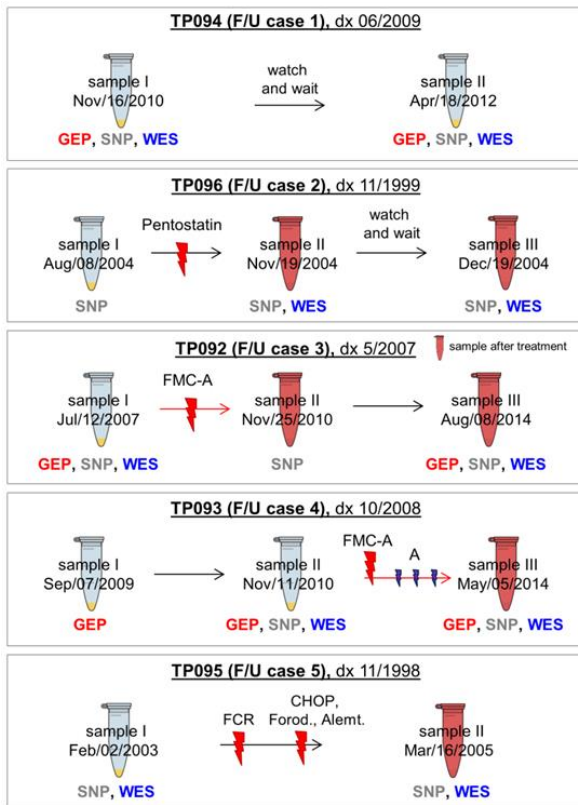

**b**

$p < 0.05$ ;  $FC \geq 2$ ; up-regulated / down-regulated genes

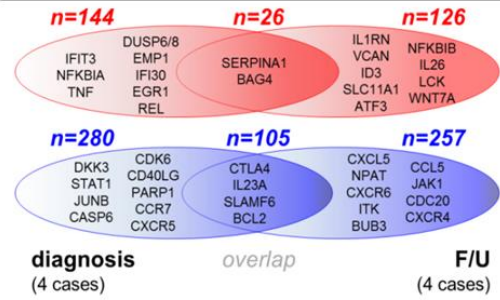

**c**

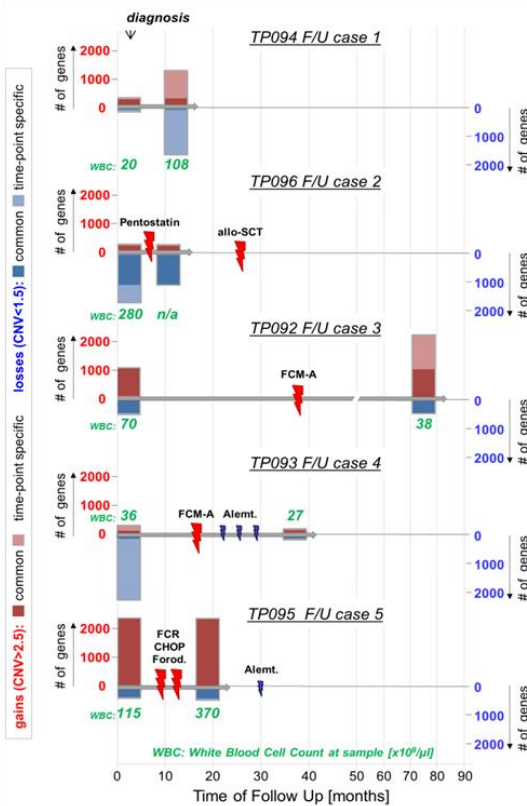

**d**

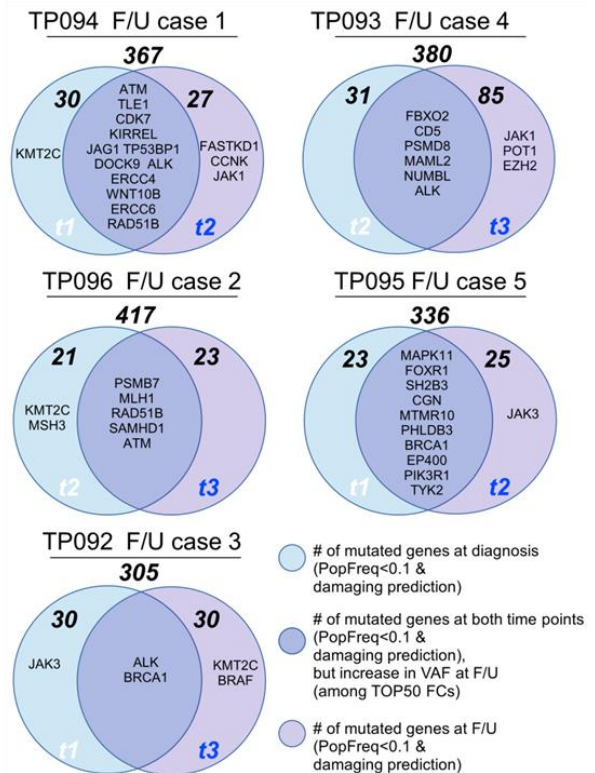

484  
485  
486  
487

**Supplementary Figure 13: Analysis of sequential follow-up (F/U) samples**  
 legend on next page

488 **Supplementary Figure 13: Analysis of sequential follow-up (F/U) samples**

489 **a)** Among the total of 72 T-PLL analyzed on sequencing platforms, sequential  
 490 samples were available for n=5 cases with sufficiently long F/U (13 samples). The  
 491 median total F/U time for all cases was 24 months (range 5 - 85) and the median of  
 492 sample intervals was 20.5 months. The first samples, close to initial diagnosis  
 493 (treatment naïve), were followed by those after clinically relevant progression or  
 494 relapse after therapy. These samples were analyzed by at least one of the profiling  
 495 approaches: GEP, SNP-arrays (for sCNAs), and WES. For F/U case 1, one second  
 496 sample was collected after 17 months. In F/U case 2, within 8 months 3 samples  
 497 were collected and analyzed via sCNA profiling and WES. In F/U case 3, 3  
 498 sequential samples were collected over a long course of 95 months and subjected to  
 499 GEP, sCNA profiling, and WES. This patient received an FMC-A chemo-  
 500 immunotherapy (fludarabine, mitoxantrone, cyclophosphamide; followed by  
 501 alemtuzumab) between 1<sup>st</sup> and 2<sup>nd</sup> sampling. F/U case 4: over 56 months, 3 samples  
 502 were collected and analyzed via GEP, sCNA profiling, and WES. F/U case 5: 2  
 503 sequential samples within 24 months. This patient was heavily treated in-between  
 504 with distinct chemo-immunotherapies: FCR (fludarabine, cyclophosphamide,  
 505 rituximab), CHOP (cyclophosphamide, doxorubicine, vincristine, and prednisone),  
 506 forodesine, and single-agent alemtuzumab. Here, sCNA profiling and WES were  
 507 performed.

508 **b)** GEP of 4 cases with available F/U sample pairs. Differential expression calculated  
 509 separately for each time point (vs. healthy-donor T-cells). Selection from lists of  
 510 differentially up- (red) and down-regulated (blue) genes at each time-point or with  
 511 overlap (**Supplementary Data 16**). The majority of transcripts were specifically  
 512 restricted to either time-point. We furthermore identified an increase in *TCL1A* mRNA  
 513 levels ( $fc^{t1}=4.24$ ,  $p=0.09$  vs.  $fc^{t2}=11.34$ ,  $p=0.03$ , Student's t-test) in all cases. The  
 514 genes with unchanged dysregulated mRNA levels were frequently those that most  
 515 significantly contributed to the difference of T-PLL to normal T-cells, i.e. *CTLA4*,  
 516 *SLAMF6* (**Fig.1**).

517 **c)** Total numbers of genes affected by sCNAs (gains=red / losses=blue) plotted for  
 518 the 5 F/U pairs. The difference of global sCNAs between t1 (2402 events at diagno-  
 519 sis) and the time of progression / relapse (3356 events) is quantified by 1.4-fold  
 520 ( $p=0.06$ , Wilcoxon test). Treatments and leukocyte counts at sampling are indicated  
 521 (also **Supplementary Data 17**).

522 **d)** WES of 5 F/U cases: Mutated genes at first vs. second time-point were compared;  
 523 a selection of affected genes is highlighted and overall numbers provided. See also  
 524 **Supplementary Data 18** and **Fig.5c** for dynamics of dominant clusters and their lead  
 525 variants.

526

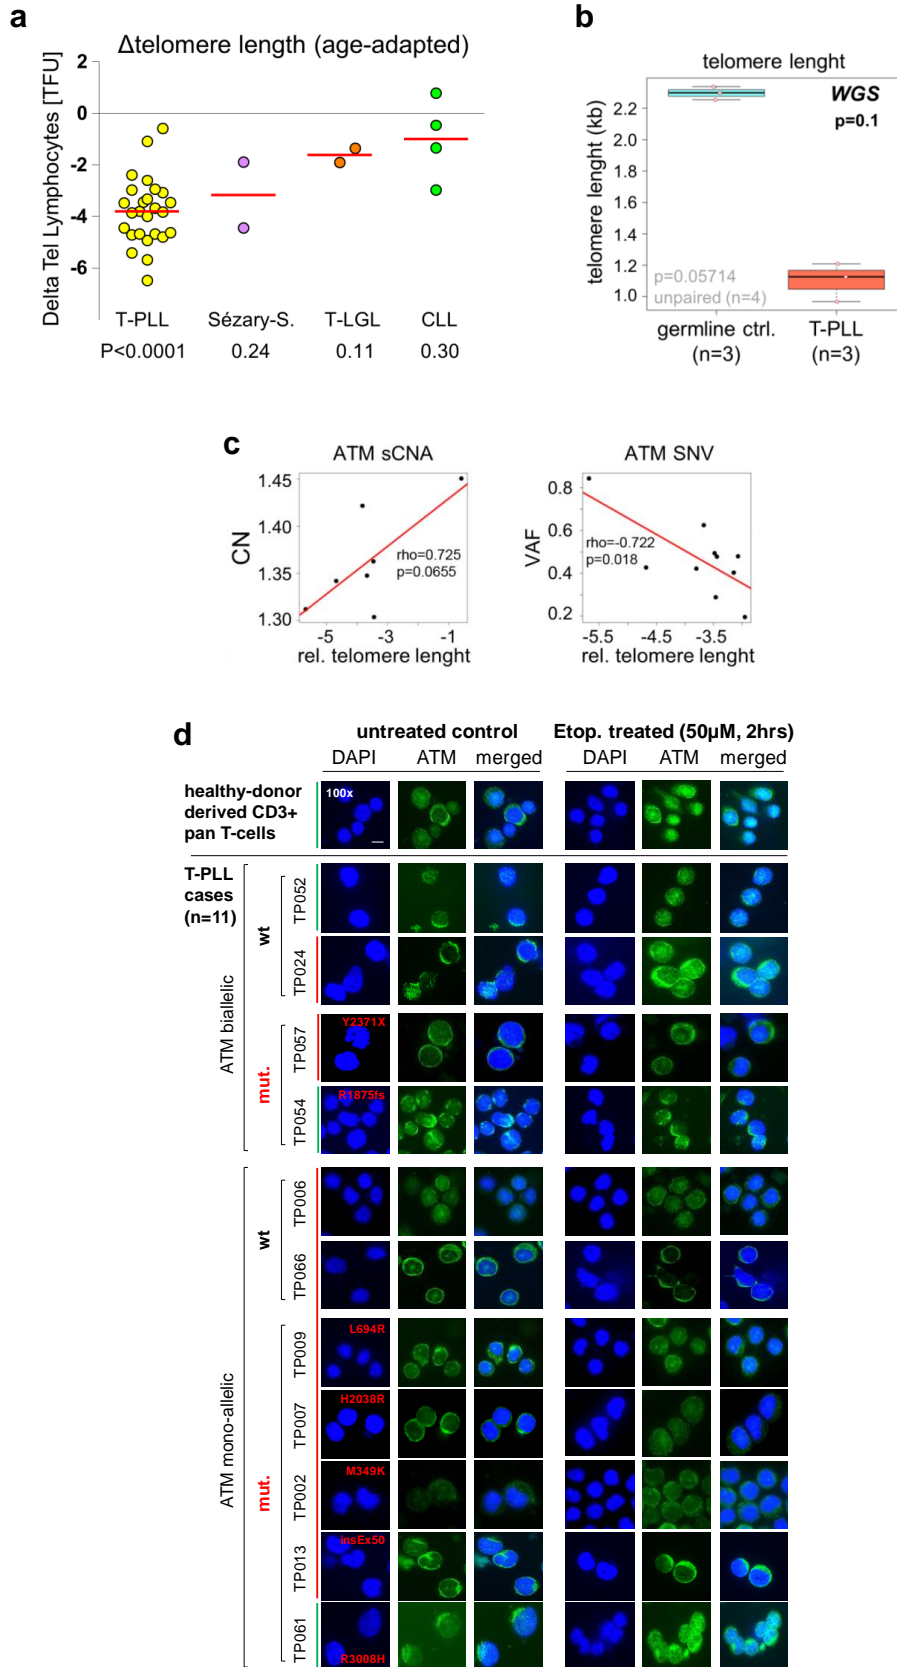

527  
528

529 **Supplementary Figure 14: Primary T-PLL cells show a phenotype of severe**  
530 **telomere attrition and impaired ATM nuclear translocation upon DNA**  
531 **damage**

532 legend on next page

533 **Supplementary Figure 14: Primary T-PLL cells show a phenotype of severe**  
534 **telomere attrition and impaired ATM nuclear translocalization upon DNA**  
535 **damage**

536 **a)** Telomere lengths in 26 T-PLL cases (compare to **Fig.7a** for an age-adjusted  
537 depiction) as well as 4 CLL, 2 T-LGL, and 2 cases of Sézary Syndrome.  
538 Measurements were done by flow-FISH and healthy controls were used for age-  
539 adaptation as described previously<sup>22</sup>. One telomere fluorescence unit (TFU)  
540 corresponds to 1 kilobase pair(s). The data confirm indications of particularly short  
541 telomeres in T-PLL in a previous smaller series<sup>23</sup>.

542 **b)** Telomere lengths were evaluated according to WGS data using the 'telseq'<sup>24</sup>  
543 algorithm. The difference between tumor and germline samples (n=3 paired WGS  
544 data sets and the 1 WGS tumor 'single' included) was not statistically significant  
545 (p=0.1 in Wilcoxon paired test; p=0.06 in unpaired; consider small sample size).  
546 Boxes represent the interquartile range (IQR); thick line reflects the mean; whiskers  
547 indicate the lower and upper limits. Lower limit =  $x_{0.25} - 1.5 * IQR$  and upper limit =  
548  $x_{0.75} + 1.5 * IQR$ .

549 **c)** Association of telomere lengths (flow-FISH) with *ATM* lesions (sCNAs and  
550 sSNVs): showing shorter ends in cases with low *ATM* CNs and high *ATM* VAFs.

551 **d)** Subcellular *ATM* localization in IF microscopy of cytopins of untreated vs.  
552 Etoposide-treated primary T-PLL cells and PBMC controls (scale bar =5µm;  
553 supplementary data to **Fig.7b**; here all analyzed cases). IF panel: Only 3 of 11 cases  
554 (green marks) show a predominant nuclear translocalization of *ATM* upon DSB  
555 induction comparable to healthy-donor PBMCs (one representative example of 3  
556 experiments shown). Among cases with regular *ATM* subcellular kinetics, one  
557 harbored an *ATM*-biallelic / unmutated constellation, one had an *ATM* biallelic  
558 genotype with a mutation (R1875fs), and one an *ATM*-monoallelic genotype with a  
559 mutation in the FATC domain (R3008H). Seven of the 8 cases without proper *ATM*  
560 translocalization (red marks) had affected, but heterogeneous, *ATM* genotypes.

561

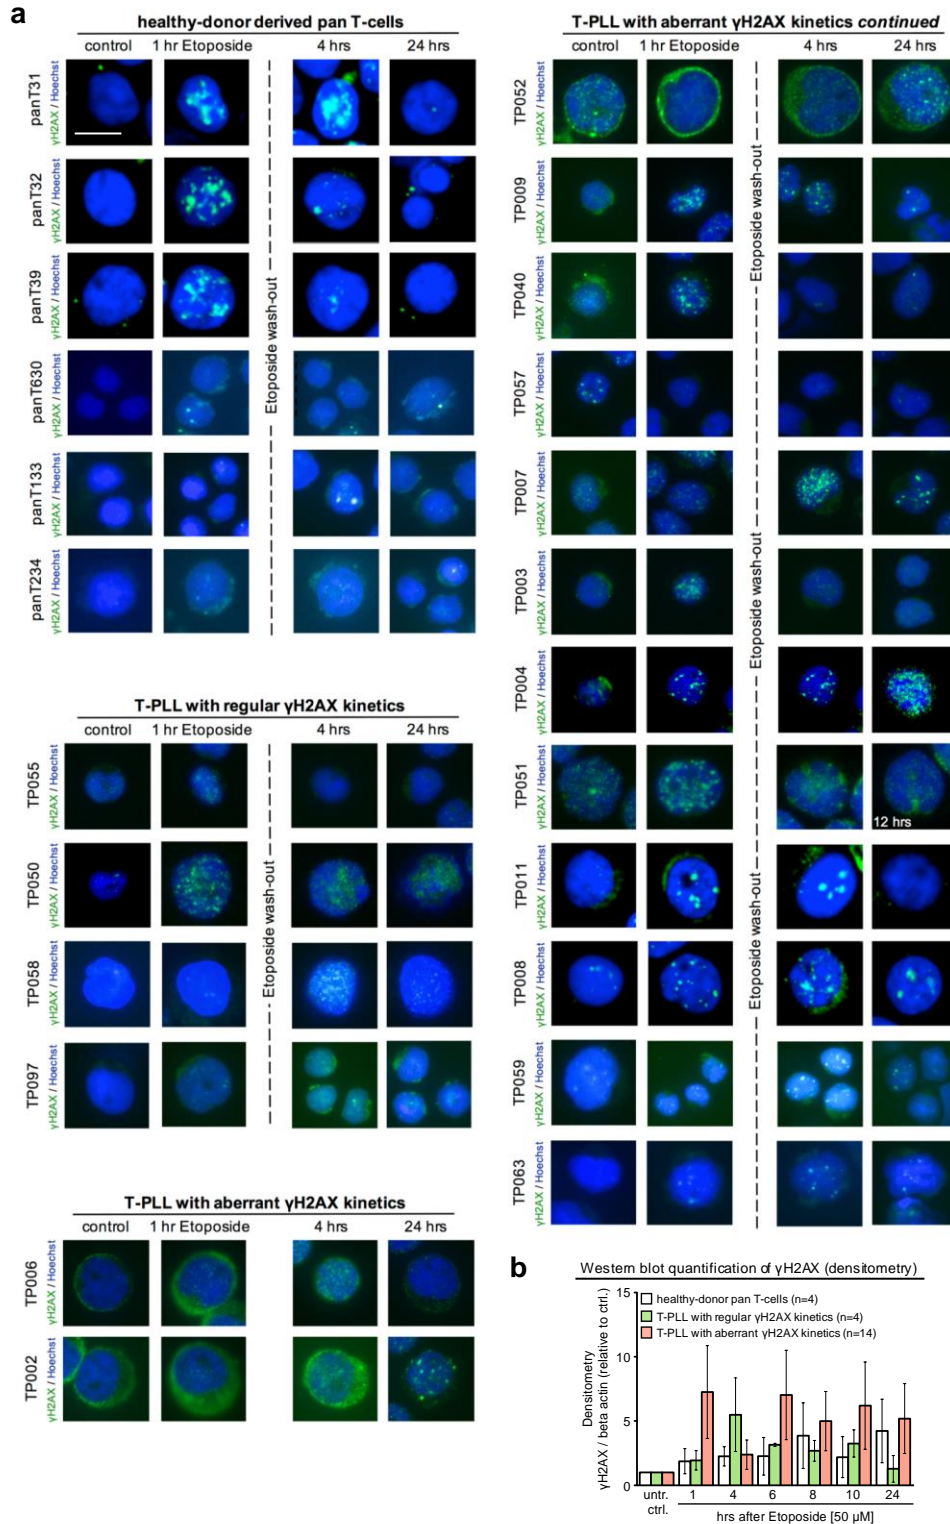

562

563

564

565

566

567

568

569

570

**Supplementary Figure 15: yH2AX focus induction and removal in a set of 23 primary T-PLL analyzed via immunofluorescence microscopy and / or immunoblot**

**a)** Entire set of 18 T-PLL analyzed by yH2AX immunofluorescence (IF) microscopy. Overlap with Western blot data (b) towards 23 cases in total. The data supplement **Fig.7c**. Six healthy-donor T-cell samples served as controls (scale bar =5μm).

**b)** Summary of densitometries from immunoblots of n=18 cases vs. 4 T-cell controls (mean with SEM).

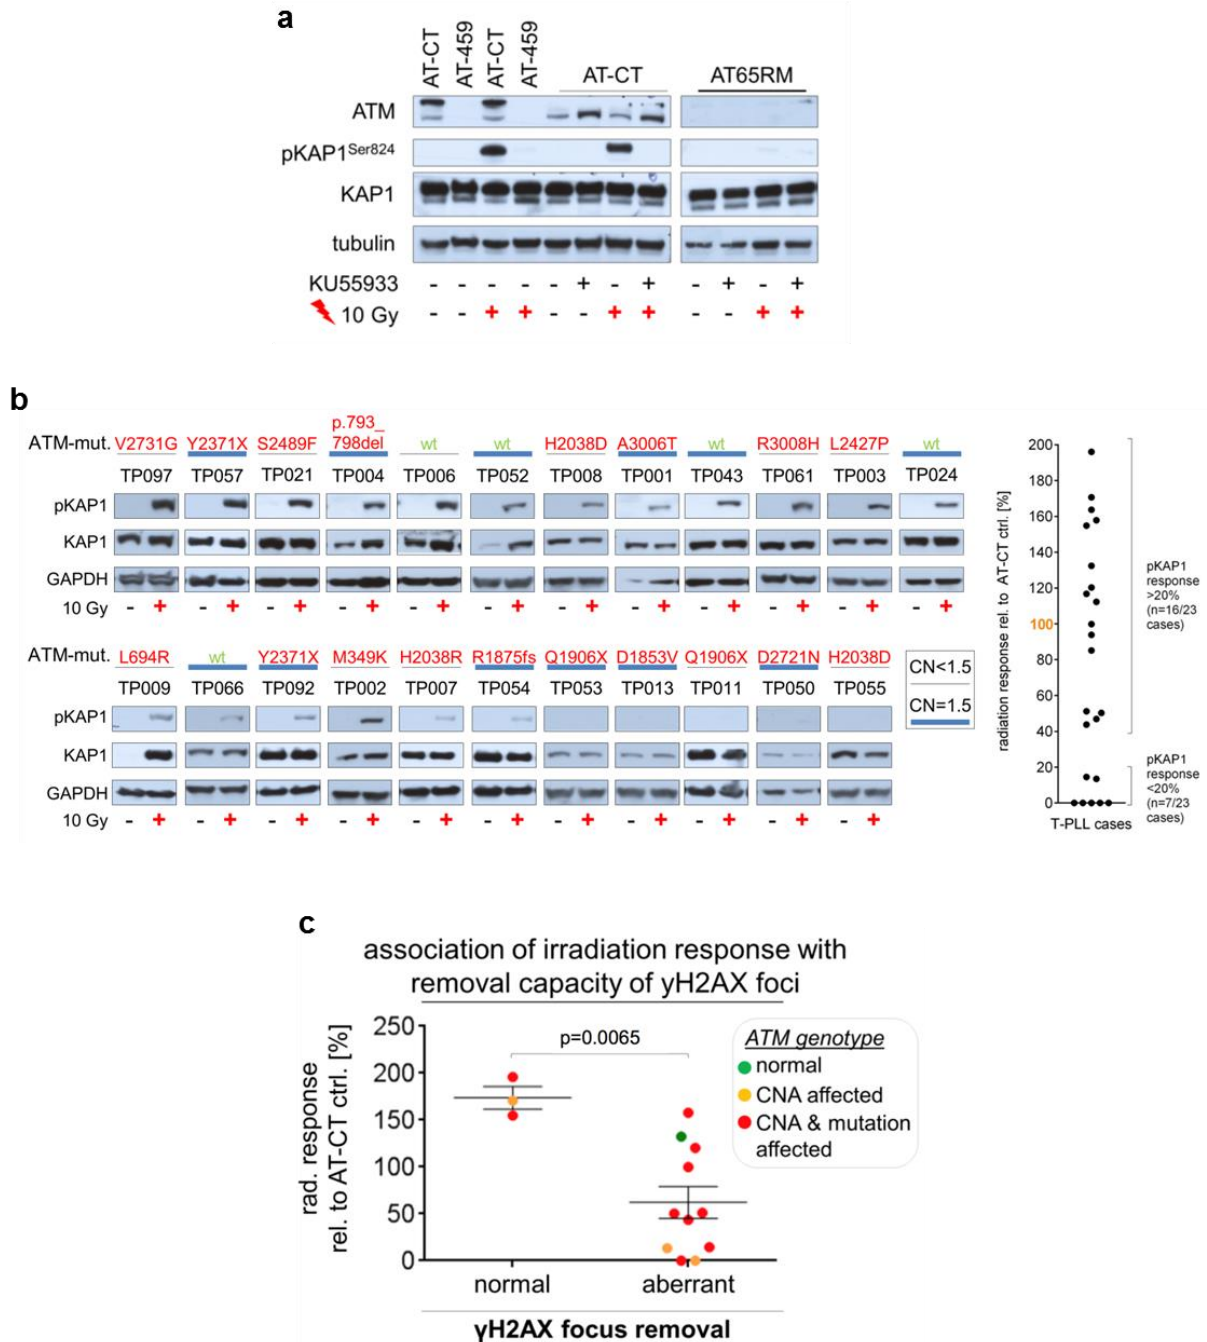

571  
572

573 **Supplementary Figure 16: ATM in primary T-PLL cells is hypomorphic as per**  
574 **canonical effector functions**

575 **a)** Control system for activation of the ATM target KAP1 (see **b**): lymphoblastoid B-  
576 cell lines from *A-T* patients<sup>25</sup> (AT65RM,  $ATM^{A/\Delta}$ , c.6573-9G->A/ c.8814\_8824del11,  
577 ATM protein absent) or unaffected relatives (AT-CT,  $ATM^{wt}$ ) were pretreated with the  
578 ATM kinase inhibitor KU55933 at 50 $\mu$ M for 2hrs. Cells were then exposed to 10Gy  
579 ionizing irradiation (IR) and pKAP1<sup>Ser824</sup> levels were detected 1hr thereafter by  
580 Western blot. IR-induced phosphorylation of KAP1 is only detectable in ATM wt cells  
581 without KU55933 treatment underlining the specificity of ATM mediated KAP1  
582 phosphorylation.

583 **b)** KAP1<sup>Ser824</sup> phosphorylation upon 10Gy IR was assessed in primary T-PLL cells of  
584 23 cases. Note that separation of lanes in the presentation of Western blot data was  
585 done in order to better assemble cases according to their pKAP1 response levels.  
586 Overall, the bulk of cases showed residual pKAP1 induction, despite genomic *ATM*  
587 lesions; some (9/23 cases) even above the levels (100%-mark) seen in AT-CT  
588 control cells (densitometry data on right). T-PLL with *ATM* in CN-biallelic / SNV-wt  
589 constellation usually revealed IR-induced KAP1 phospho-activation, while the rare T-  
590 PLL with truncating mutations (TP011; Q1906\*) or some few cases with CN  
591 monoallelic / *ATM* mutated status (TP055) did not. Quantification of IR response by  
592 densitometry of immunoblots: the levels of pKAP<sup>Ser824</sup> protein relative to pan-KAP1  
593 and housekeeping controls were normalized to induced pKAP1<sup>Ser824</sup> levels in the AT-  
594 CT control cell line (set to 100%).  
595 **c)** There is a correlation of the capacity to phosphorylate KAP1 upon IR (mean with  
596 SEM) with the capacity to induce / remove γH2AX foci following etoposide treatment  
597 (see **Fig.7c**). Cases with regular biochemical IR responses (pKAP1) show normal  
598 γH2AX kinetics. More than half of cases with abnormal γH2AX platform induction /  
599 resolution show reduced pKAP1<sup>Ser824</sup> responses.  
600

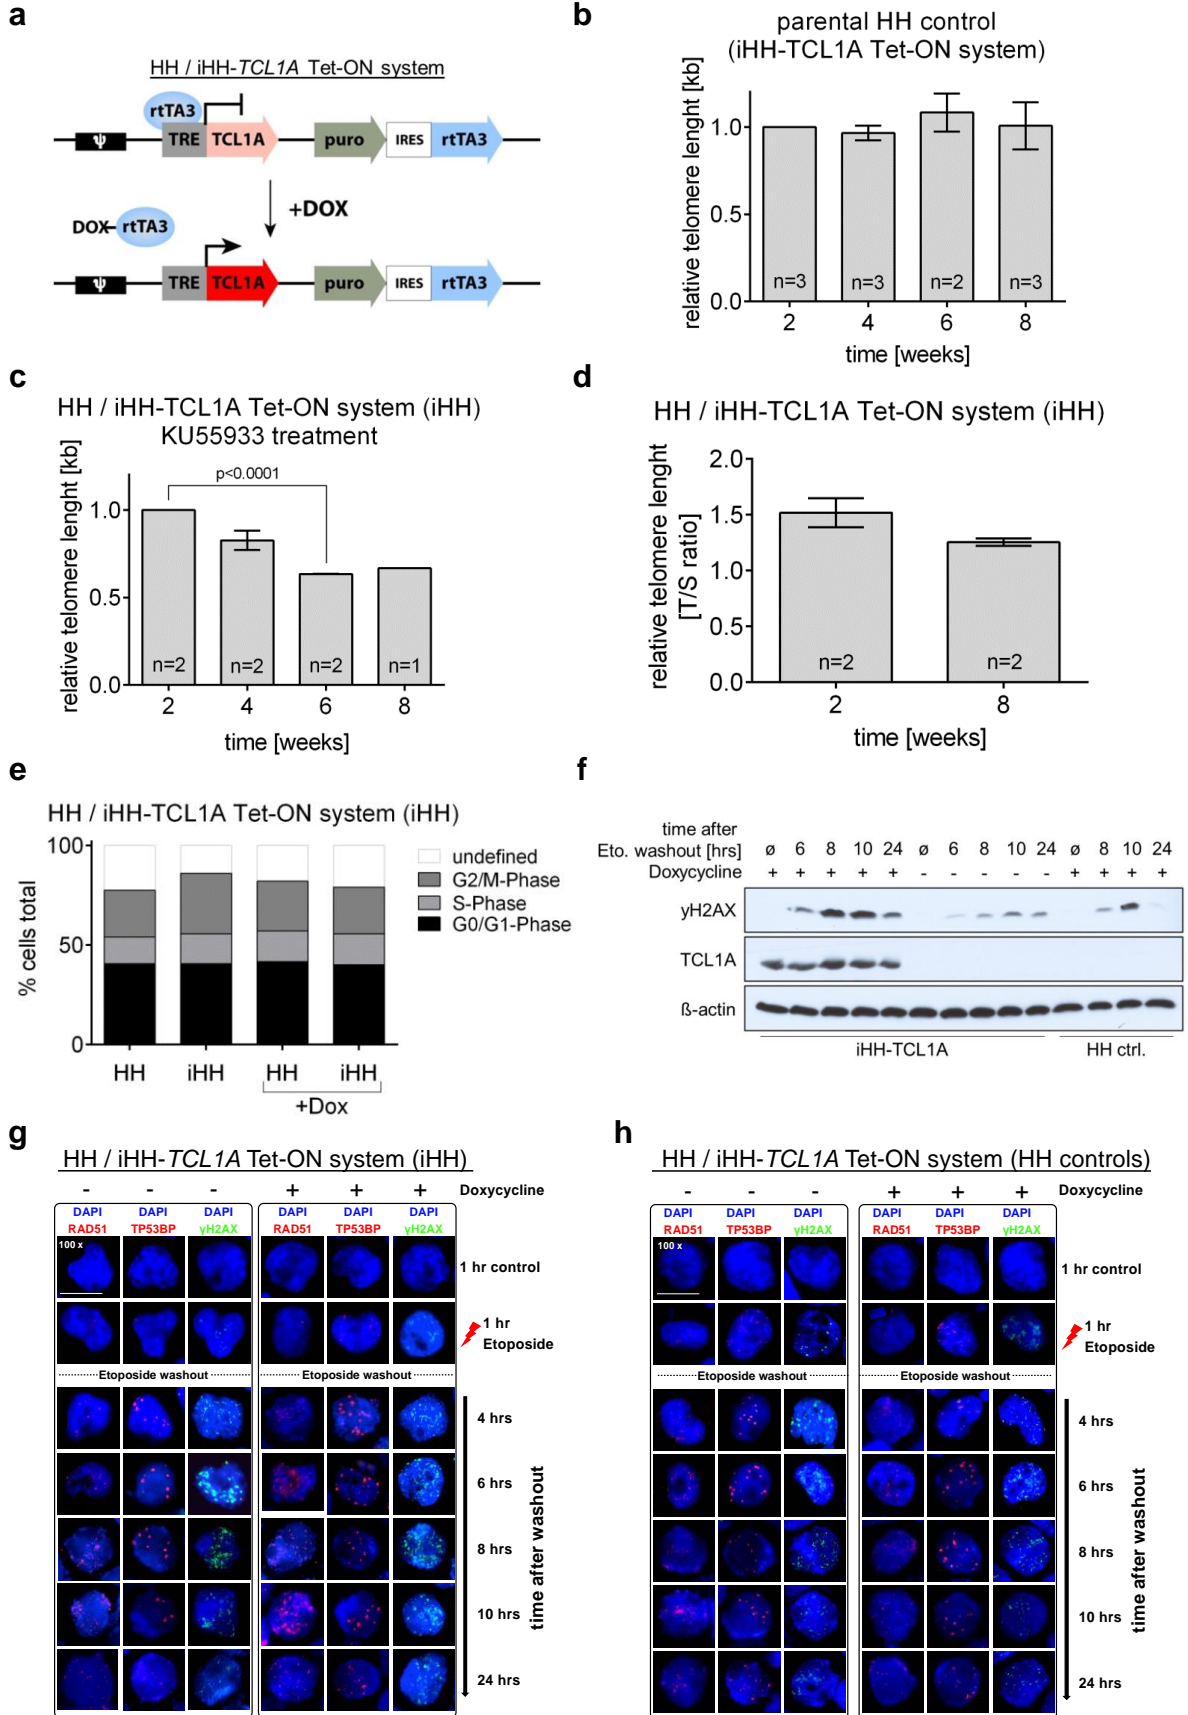

601  
602  
603  
604  
605

**Supplementary Figure 17: Ectopic expression of *TCL1A* affects telomere maintenance and the yH2AX mediated DDR legend on next page**



606 **Supplementary Figure 17: Ectopic expression of *TCL1A* affects telomere**  
607 **maintenance and the  $\gamma$ H2AX mediated DDR (Supplements to Fig.8)**

608 **a)** Schematic representation of the *TCL1A* expression vector stably transfected in HH  
609 mature T-cell leukemia cells (resulting line 'iHH'). TRE: tetracycline responsive  
610 element; Puromycin: Puromycin resistance cassette; IRES: internal ribosomal entry  
611 site; rtTA3: reverse tet-transactivator 3. Inducible *TCL1A* expression: upon  
612 Doxycycline (Dox) treatment, release of the transactivator protein from *TCL1A*  
613 promoter binding results in induction of *TCL1A* transcription.

614 **b-d)** Telomere length measurements (mean with SEM, supplementary data to  
615 **Fig.8a**). **b&c)** Flow-FISH data: Doxycycline treatment of parental HH cells does not  
616 affect telomere lengths over a time-course of 8 weeks; telomere shortening in  
617 response to pharmacological ATM inhibition (63.3% after 6 weeks;  $p < 0.0001$ ,  
618 Student's t-test). **d)** qRT-PCR based validations of telomere length reduction in  
619 Doxycycline treated (*TCL1A* expressing) iHH cells (early vs. late time point) using  
620 published protocols<sup>26</sup>.

621 **e)** iHH-*TCL1A* cells and HH parental controls were treated with Doxycycline for 24hrs  
622 (1 $\mu$ g/ml). Cell cycle profiles, determined by DNA content assessments using  
623 propidium-iodide based flow-cytometry (2 replicates), showed no altered proliferation  
624 of *TCL1A* expressing HH cells, allowing to exclude increased replicative stress as a  
625 main cause for the altered DDR and telomere length (net gain in genomic instability)  
626 in the presence of *TCL1A*.

627 **f)** Immunoblots for  $\gamma$ H2AX in iHH / HH cells (no *ATM* sCNA, see also DSMZ  
628 catalogue #ACC707 for karyotype of HH cells) upon Etoposide-induced DSBs (50 $\mu$ M;  
629 1hr) monitored over 24hrs. Doxycycline-induced *TCL1A* expression enhances  $\gamma$ H2AX  
630 levels in response to DSBs induction (compare **Fig.8c**, **Supplementary Figs.17g,h**  
631 for parallel time lines of immunofluorescence (IF) microscopy based recordings of  
632  $\gamma$ H2AX foci).

633 **g)** IF stainings of cytopins of iHH cells (+/- Doxycycline pre-exposure) after DSB  
634 induction by Etoposide (50 $\mu$ M; 1hr). Enforced *TCL1A* expression and its impact on  
635 the kinetics of  $\gamma$ H2AX, RAD51, and TP53BP1 focus induction and removal: delayed  
636 resolution in the presence of *TCL1A*. Representative images are shown (scale bar  
637 =7.5 $\mu$ m; overall quantifications (focus counts) and representative  $\gamma$ H2AX time lines  
638 are in **Fig.8c**.

639 **h)** In analogy to g) here for the parental HH cells, including Doxycycline controls.  
640 Representative images and focus counts (means, SEM) are shown. In the absence  
641 of a transfected *TCL1A* overexpression construct, no difference in focus induction  
642 and resolution was detected between the +/- Doxycycline conditions.

643

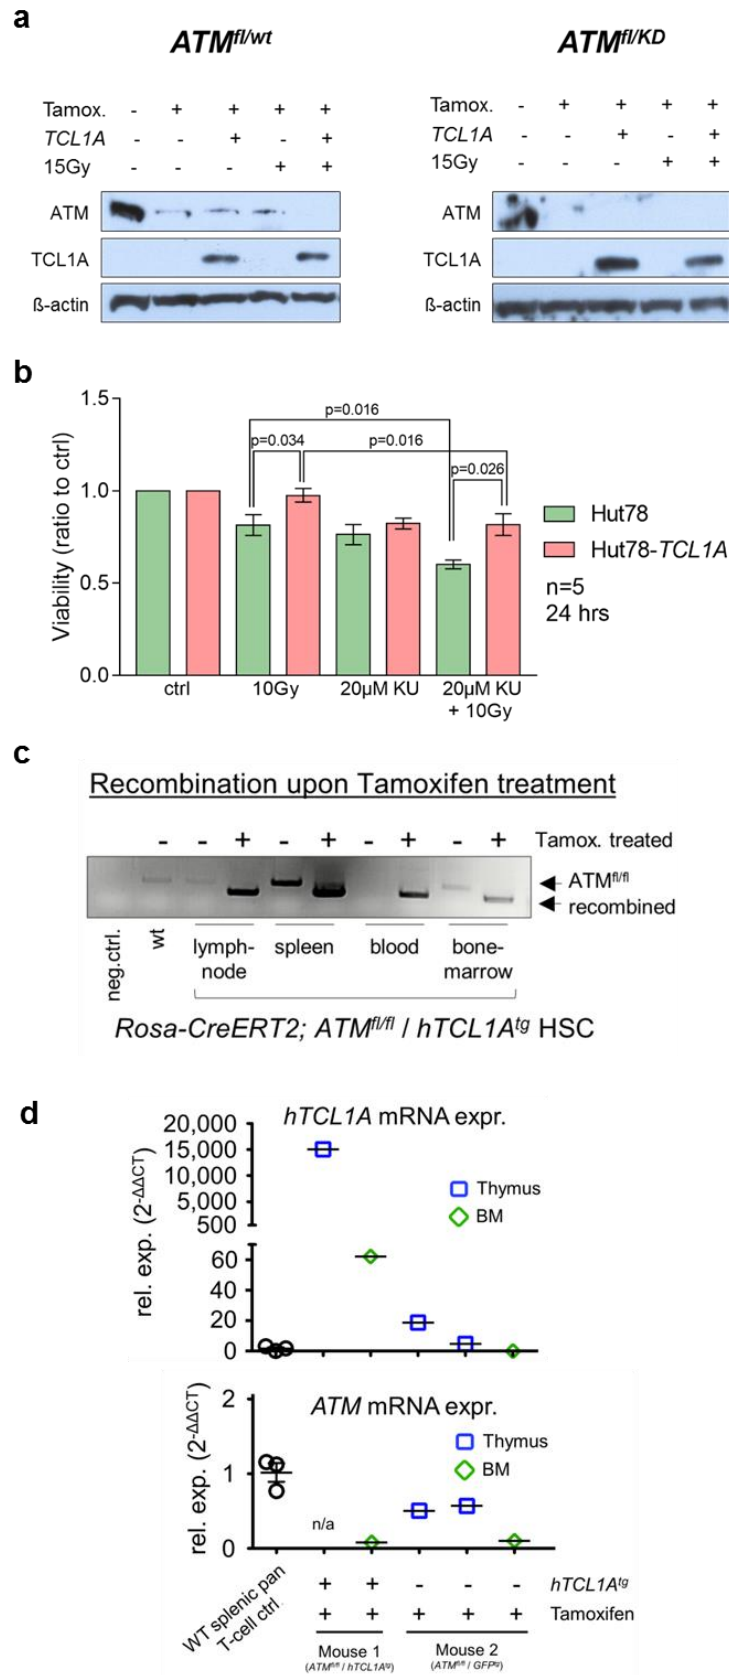

644  
645  
646  
647  
648

**Supplementary Figure 18: Ectopic *TCL1A* overexpression cooperates with *ATM* deficiency towards accelerated T-cell lymphoma/leukemia development**  
legend on next page

649 **Supplementary Figure 18: Ectopic *TCL1A* overexpression cooperates with *ATM***  
650 **deficiency towards accelerated T-cell lymphoma/leukemia development**

651 **a)** Immunoblots showing Tamoxifen mediated loss of ATM protein and experimentally  
652 introduced *TCL1A* overexpression in immortalized murine embryonic fibroblasts  
653 (MEFs). These MEFs were derived from mice carrying transgenes for the conditional  
654 expression of *ATM* variants, namely *Rosa-Cre<sup>ERT2</sup>;ATM<sup>fl/wt</sup>* (for monoallelic loss) and  
655 *Rosa-Cre<sup>ERT2</sup>;ATM<sup>fl/KD</sup>* (for exclusive expression PI3-kinase dead (KD) mutated *ATM*  
656 after loss of 'floxed' allele)<sup>27</sup> (data supplementing **Fig.8d**).

657 **b)** Hut78 and Hut78-*TCL1* T-cell leukemia cells were treated with 20µM KU55933  
658 and subsequently subjected to  $\gamma$ -irradiation (10Gy) or subjected to only either of  
659 these conditions. Viability was measured after 24hrs using the MTT assay. *TCLA*  
660 expression conveys a survival benefit in response to irradiation, particularly in the  
661 context of *ATM* kinase inhibition (mean with SEM, paired Student's t-test).

662 **c)** Data supplementing **Fig.8e**: PCR results from animals that were taken out from  
663 observation right after the end of tamoxifen injections. Neg. ctrl.: non-template H<sub>2</sub>O  
664 ctrl.; wt: B6/C57J splenocytes. The shorter PCR product indicates successful  
665 recombination at the *Rosa-Cre<sup>ERT2</sup>;ATM<sup>fl/fl</sup>* locus.

666 **d)** qRT-PCRs of 2 tumor bearing mice: mouse 1 (*ATM<sup>fl/fl</sup>/hTCL1A<sup>tg</sup>* Tamoxifen  
667 treated) and mouse 2 (*ATM<sup>fl/fl</sup>/GFP<sup>tg</sup>* Tamoxifen treated). A higher *hTCL1A* mRNA  
668 (top) and a lower *ATM* mRNA (bottom) expression was seen according to the  
669 targeted alleles in comparison to WT T-cells. Bone marrow (BM) represents non-  
670 tumor bearing hematopoietic tissue and thymus represents tumor tissue of the  
671 analyzed diseased mice transplanted with *ATM<sup>fl/fl</sup>/hTCL1A<sup>tg</sup>* or *ATM<sup>fl/fl</sup>/GFP<sup>tg</sup>*  
672 hematopoietic stem cells. This also speaks to the T-lineage specificity of the  
673 leukemogenic *TCL1/ATM* cooperation.

674

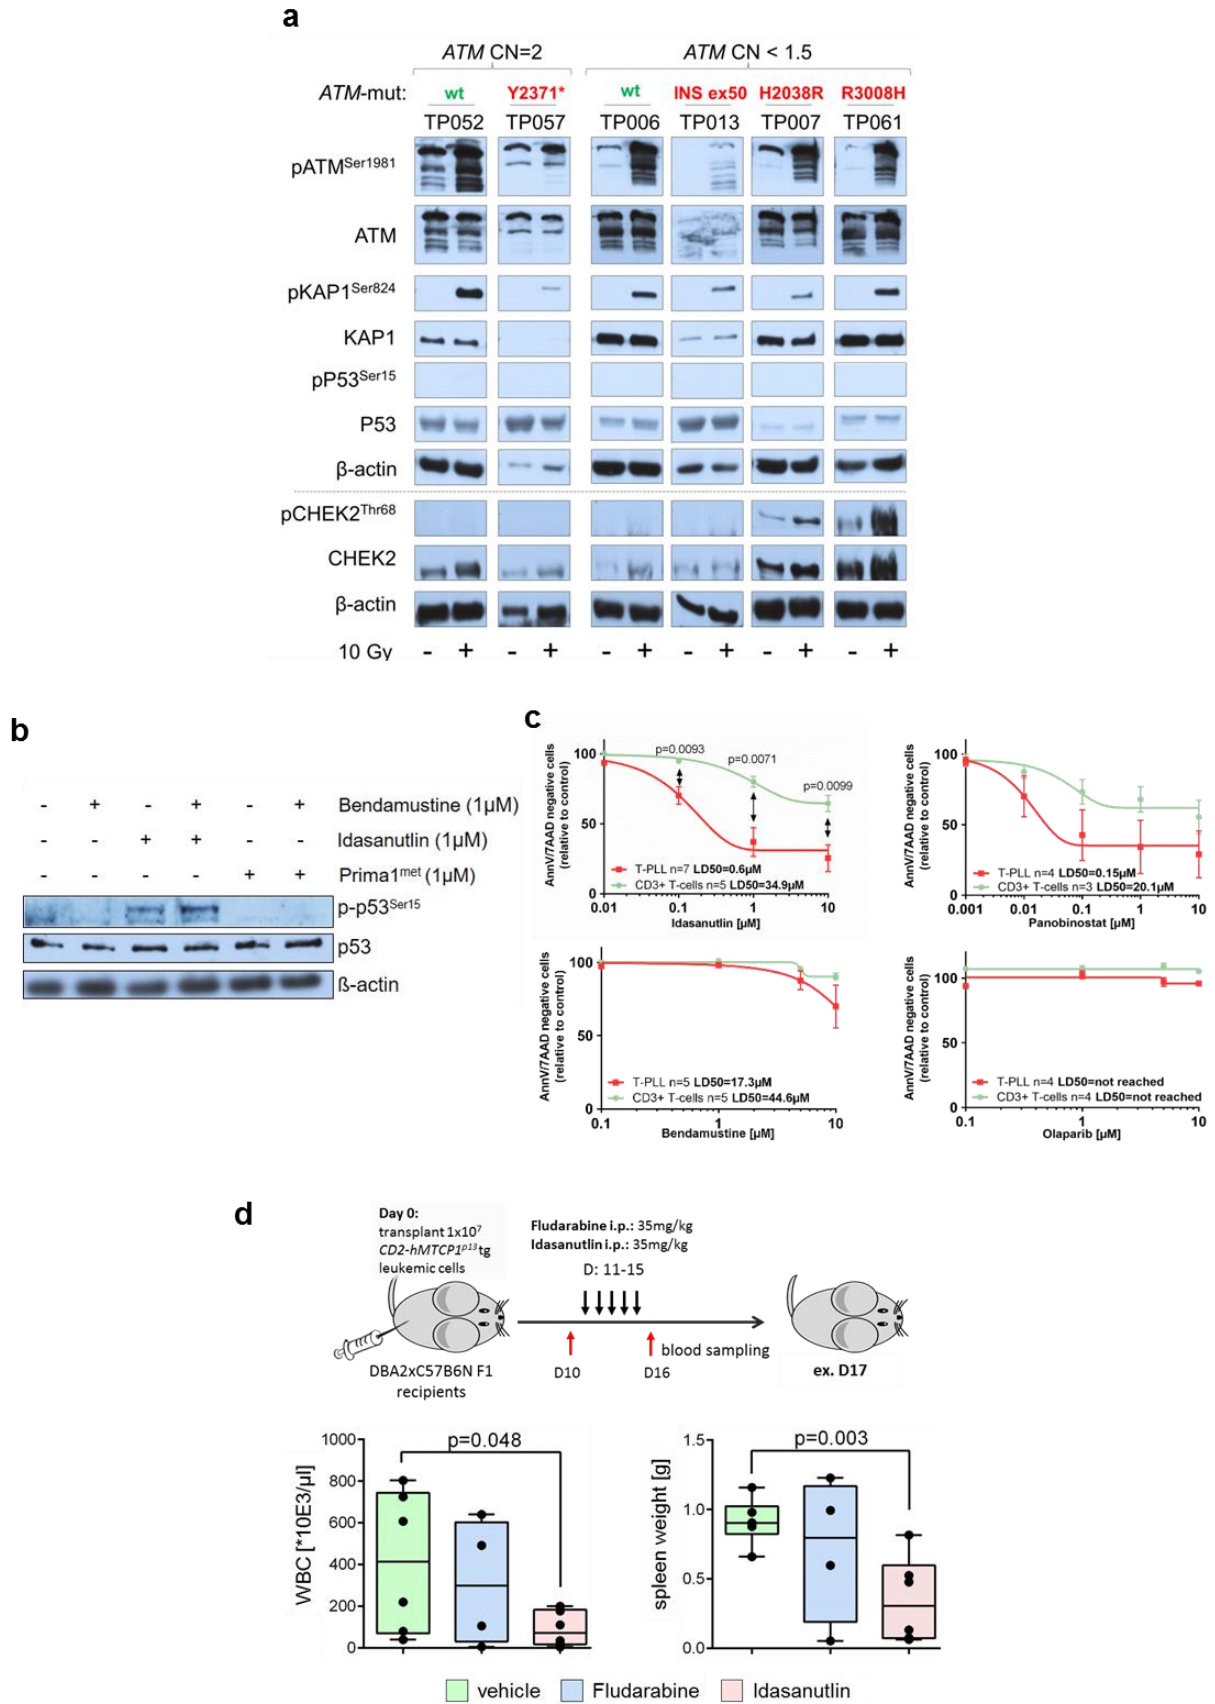

675  
676  
677  
678  
679

**Supplementary Figure 19: Exploitation of the deficient ATM/CHEK2/p53 axis**  
legend on next page

680 **Supplementary Figure 19: Exploitation of the deficient ATM/CHEK2/p53 axis**  
681 **a)** Phosphorylation of ATM<sup>Ser1981</sup>, KAP1<sup>Ser824</sup>, CHEK2<sup>Thr68</sup> and p53<sup>Ser15</sup> upon 10Gy  
682 ionizing irradiation (IR) in T-PLL cells (n=6 cases). pCHEK2 activation is only  
683 observed in 2 cases, irrespective of genomic *ATM* status or of the preserved  
684 upstream pATM induction. Median purity of T-cells 97.5%; lanes separated for  
685 genotype-based arrangement. Please note that due to sample exhaustion only these  
686 6 cases could be analyzed for pCHEK2. Two independent immunoblots are  
687 separated by a dashed line. For completion, the corresponding data of these cases  
688 on ATM, KAP1, and p53 from **Fig.9b** and **Supplementary Fig.16b** are included here  
689 as well.

690 **b)** Primary T-PLL cells were treated with Idasanutlin, Prima1<sup>met</sup>, Bendamustine, and  
691 combinations (all at 1μM) for 24hrs *in vitro*. Phospho-activation of p53, as detected  
692 via immunoblots, was seen in Idasanutlin conditions. In line with the *TP53* wt status  
693 of most T-PLL cases, no de-repression of p53 was observed upon Prima1<sup>met</sup>.

694 **c)** Primary T-PLL cells (n=4-7 cases) were exposed to increasing concentrations of  
695 Idasanutlin, Panobinostat, Bendamustine, and Olaparib (ranges between 0.001-  
696 10μM) for 48hrs. Idasanutlin and Panobinostat selectively induced apoptosis in  
697 primary T-PLL cells (Idasanutlin LD50=0.6μM, Panobinostat LD50=0.15μM); healthy-  
698 donor derived pan-T-cells were less affected. Bendamustine did only induce  
699 apoptosis at higher concentrations (LD50=17.3μM) and Olaparib did not show any  
700 apoptotic effects in T-PLL cells (LD50=not reached). Cell death was quantified by  
701 AnnexinV/7AAD flow cytometry (means, SEM; Student's t-test for single  
702 concentrations 0.01-10μM comparing T-PLL vs. healthy donor derived T-cells).

703 **d)** System of syngeneic transplants of leukemic cells from the *CD2-hMTCP1<sup>p13</sup>*  
704 transgenic murine T-PLL model. Top: Scheme of scheduling and dosing (further  
705 details in **Methods**). Bottom: Leukemic burden and progression were suppressed by  
706 Idasanutlin, as leukocyte counts (p=0.048) and spleen weights (mean with SEM,  
707 p=0.003, Student's t-tests) were reduced after treatment with Idasanutlin compared  
708 to Fludarabine ('standard' nucleoside analogue in T-PLL) or to vehicle. Post-mortem  
709 spleen weights (mice uniformly sacrificed at day 17) for the 3 treatment groups  
710 (means, SEM) corroborate the findings from peripheral blood.

711

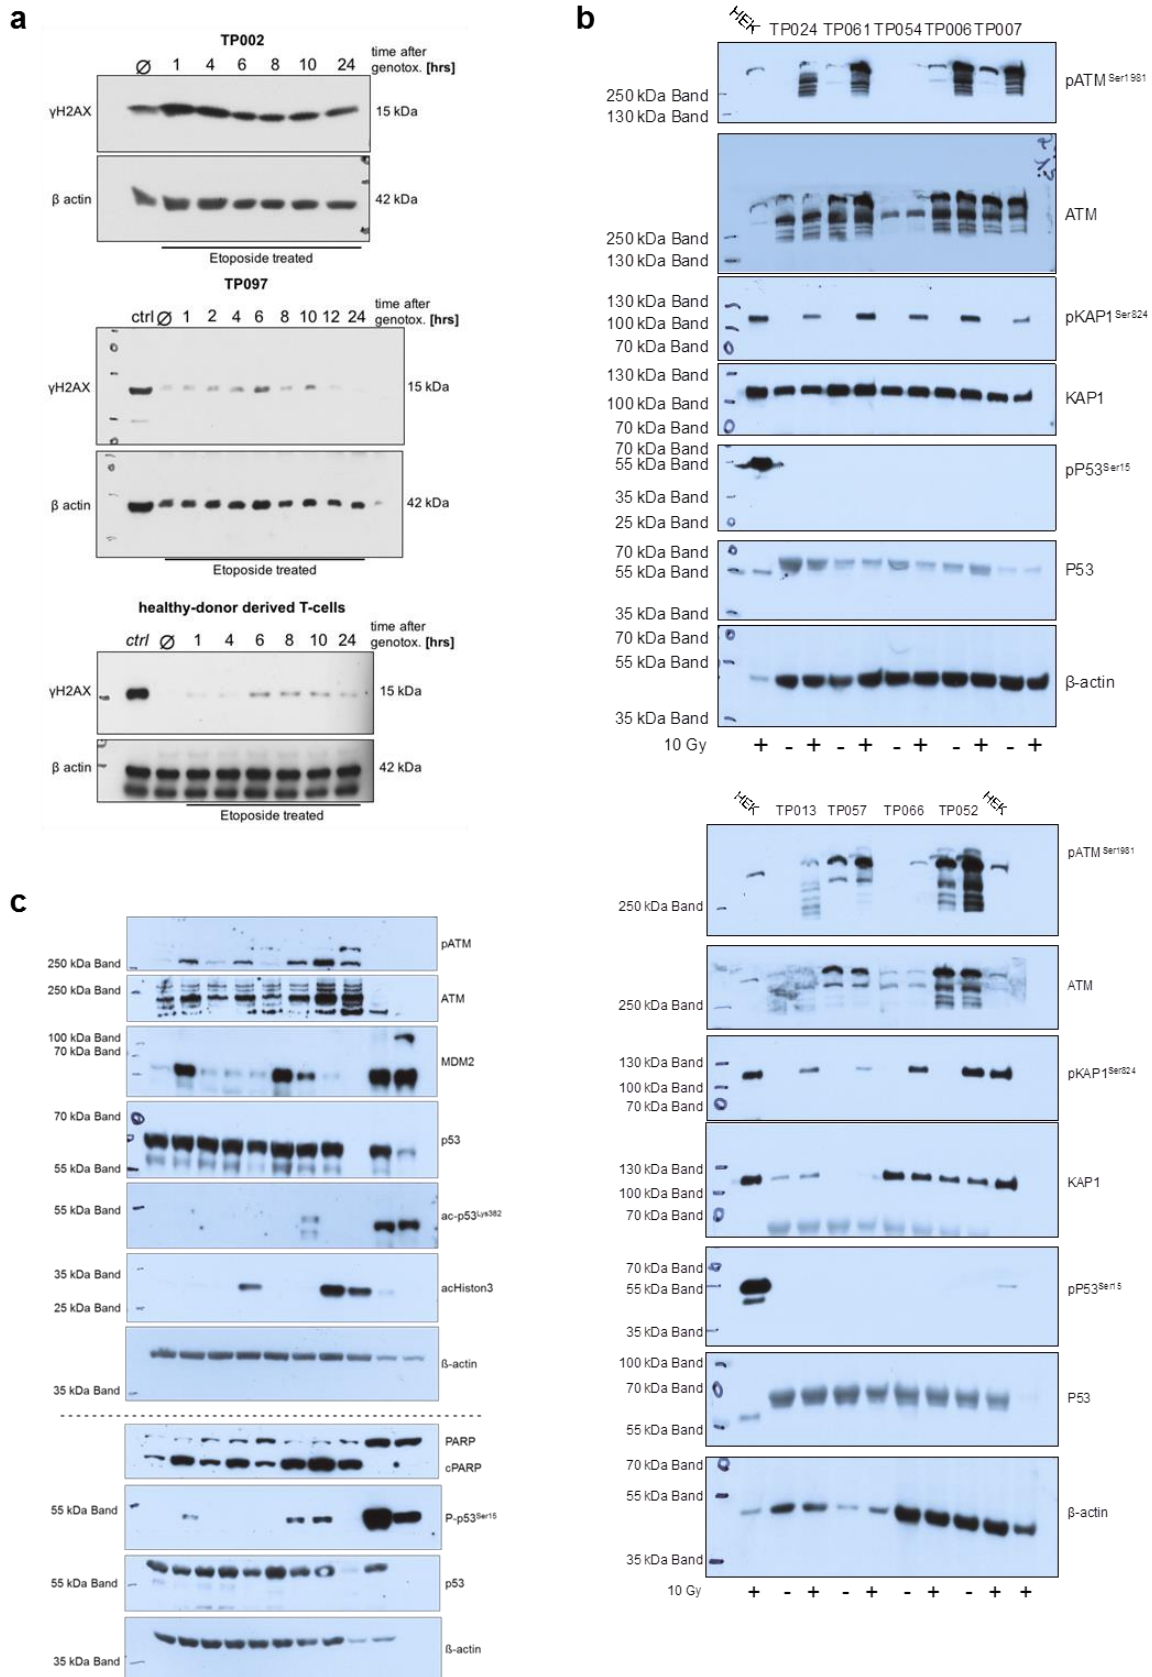

712

713

**Supplementary Figure 20: Uncropped images of immunoblots**

714 **a)** Immunoblots supplementing Figure 7c.

715 **b)** Immunoblots supplementing Figure 9b.

716 **c)** Immunoblots supplementing Figure 9c.

717

718 **Supplementary Table 1: Profiling data in larger cohorts of T-PLL**

719 We summarize here published studies that presented immunophenotypic, cytogenetic,  
 720 genomic or transcriptomic data sets on sizable cohorts of T-PLL. Earlier studies,  
 721 mostly based on clinical and flow-cytometric analyses revealed the non-descript T-  
 722 cell immunophenotype of T-PLL, its dominant involvement of *TCL1A* affecting cyto-  
 723 genetic lesions, and the loss of *ATM* by Karyotype G-banding, FISH, and microsatel-  
 724 lite typing<sup>11,19,28-30</sup>. In recent years, smaller series on gene expression profiling  
 725 (GEP)<sup>3</sup>, copy-number (CN) screens<sup>3</sup>, targeted amplicon<sup>20,31,32</sup> and whole exome<sup>16</sup>  
 726 sequencing (TAS, WES) provided isolated first fragments of genome-wide analyses.

| 1 <sup>st</sup> Author <sup>ref</sup> year | # of cases | Methods                                                                                                                                         | Main findings / comments                                                                                                                                                                                                                                                                                     |
|--------------------------------------------|------------|-------------------------------------------------------------------------------------------------------------------------------------------------|--------------------------------------------------------------------------------------------------------------------------------------------------------------------------------------------------------------------------------------------------------------------------------------------------------------|
| Matutes <sup>30</sup> 1991                 | 78         | Flow cytometry, Karyotype G-banding                                                                                                             | IP: 65% CD4 <sup>+</sup> CD8 <sup>-</sup> , 21% CD4 <sup>+</sup> and CD8 <sup>+</sup> , 13% CD4 <sup>-</sup> CD8 <sup>+</sup> ; genomic abnormalities: inv(14) with breakpoints at 14q11 and 14q32 in 76% of cases, trisomy 8 in 53% of cases                                                                |
| Stilgenbauer <sup>19</sup> 1997            | 24         | Karyotype G-banding, FISH, Sanger seq.                                                                                                          | identification of a small commonly deleted segment at 11q22.3-23.1 ( <i>ATM</i> ) in 63% with mutations on the remaining allele in 25% of cases                                                                                                                                                              |
| Stoppa-Lyonnet <sup>28</sup> 1998          | 15*        | LOH by microsatellite typing                                                                                                                    | inactivation of the <i>ATM</i> gene in 67% of cases through LOH                                                                                                                                                                                                                                              |
| Hetet <sup>29</sup> 2000                   | 21*        | LOH by microsatellite typing                                                                                                                    | loss of heterozygosity of the 12p13 region, including the <i>ETV6</i> and <i>CDKN1B</i> genes in 43% of cases                                                                                                                                                                                                |
| Soulier <sup>33</sup> 2001                 | 22         | Array CGH                                                                                                                                       | complex pattern of recurrent chromosomal losses and gains at e.g. 8p (86% of cases), 11q (68%), 22q11 (45%), 13q (41%), 8q (82%), 14q32 (50%)                                                                                                                                                                |
| Bradshaw <sup>17</sup> 2002                | 17         | Cloning breakpoints within the <i>ATM</i> gene, Southern blot                                                                                   | identification of breakpoints within the <i>ATM</i> gene at the RGYW somatic hypermutation motif in 18% of cases                                                                                                                                                                                             |
| Dürig <sup>3</sup> 2007                    | 5          | GEP, SNP-arrays                                                                                                                                 | differentially expressed genes enriched in genomic regions affected by recurrent chromosomal lesions (6p, 8q 6q, 8p, 10p, 11q, and 18p)                                                                                                                                                                      |
| Herling <sup>11</sup> 2008                 | 86         | Flow cytometry and Karyotype G-banding                                                                                                          | IP: 62% CD4 <sup>+</sup> CD8 <sup>-</sup> , 35% CD4 <sup>+</sup> and CD8 <sup>+</sup> , 4% CD4 <sup>-</sup> CD8 <sup>+</sup> ; genomic abnormalities: inv(14)(q11;q32.1) or t(14;14) in 40%, trisomy 8 in 35%, -11 or deletion 11q22-23 in 33%, and -17 or isochromosome 17q or deletion 17p in 13% of cases |
| Le Torielllec <sup>34</sup> 2008           | 47         | Microsatellite typing, Sanger seq.                                                                                                              | haploinsufficiency of <i>CDKN1B</i> in 43% of cases (partially based on data from Soulier et al. 2001 <sup>33</sup> )                                                                                                                                                                                        |
| Bug <sup>35</sup> 2009                     | 12         | Karyotype G-banding, GEP, SNP array, FISH                                                                                                       | recurrent loss, but lack of mutations, of the <i>SMARCB1</i> tumor suppressor gene in 33% of cases                                                                                                                                                                                                           |
| Delgado <sup>36</sup> 2012                 | -          | Review, meta-data                                                                                                                               | update on molecular and cytogenetic abnormalities                                                                                                                                                                                                                                                            |
| Bellanger <sup>31</sup> 2014               | 45         | Sanger seq.                                                                                                                                     | recurrent <i>JAK1/JAK3</i> somatic mutations in 49% of cases                                                                                                                                                                                                                                                 |
| Bergmann <sup>32</sup> 2014                | 32         | FISH, Sanger seq.                                                                                                                               | mutations of <i>JAK3</i> in 30% of cases                                                                                                                                                                                                                                                                     |
| His <sup>37</sup> 2014                     | 25         | Karyotype G-banding, FISH                                                                                                                       | frequent <i>TCL1A</i> rearrangements (75% of cases), losses of <i>ATM</i> (64%), and gains of <i>MYC</i> (67%)                                                                                                                                                                                               |
| Kiel <sup>16</sup> 2014                    | 50         | WGS, WES, SNP-arrays, Sanger seq.                                                                                                               | mutations affecting <i>EZH2</i> , <i>FBXW10</i> , and <i>CHEK2</i> ; <i>JAK/STAT</i> pathway components affected in 76% of cases                                                                                                                                                                             |
| Stengel <sup>20</sup> 2015                 | 51         | Karyotype G-banding, FISH, array CGH, amplicon NGS, Sanger seq.                                                                                 | deletions of <i>ATM</i> (69% of cases) and <i>TP53</i> (31%); mutations in <i>ATM</i> (73%), <i>TP53</i> (14%), <i>JAK1</i> (6%), <i>JAK3</i> (21%)                                                                                                                                                          |
| López <sup>38</sup> 2016                   | 43         | Targeted seq. of <i>JAK/STAT</i> genes via Sanger seq.; additional 54-gene panel (recurrently mutated in hematological cancers) by amplicon NGS | activating mutations in <i>JAK3</i> (30%) and <i>STAT5B</i> (21%) in evaluated hot-spot regions, mutations in genes encoding for epigenetic regulators ( <i>EZH2</i> 13%; <i>TET2</i> 17%; <i>BCOR</i> 9%)                                                                                                   |
| Hu <sup>39</sup> 2017                      | 97         | Karyotype G-banding, FISH                                                                                                                       | correlation of cytogenetic abnormalities with clinical outcome: ≥5 aberrations associated with worse overall survival                                                                                                                                                                                        |

**Summary on profiling studies in T-PLL.** \*paired tumor germline samples; IP – Immunophenotype; LOH – loss of heterozygosity, CGH – comparative genomic hybridization, GEP – gene expression profiling, SNP – single-nucleotide polymorphism, FISH – fluorescence in situ hybridization, NGS – next-generation sequencing, WES – whole-exome sequencing, WGS – whole-genome sequencing

727 **Supplementary Table 2: Datasets, databases, and bioinformatics tools**  
 728 We summarize here the utilized bioinformatics tools, datasets, and databases includ-  
 729 ing their literature reference.

| Datasets                                 |                                            |                                            |
|------------------------------------------|--------------------------------------------|--------------------------------------------|
| GEO ID                                   | 1 <sup>st</sup> Author <sup>ref</sup> year |                                            |
| GSE36363                                 | Wilkerson <sup>80</sup> 2012               |                                            |
| GSE25016                                 | Weiss <sup>81</sup> 2010                   |                                            |
| GSE50253                                 | Boi <sup>82</sup> 2013                     |                                            |
| GSE23452                                 | Parkin <sup>83</sup> 2010                  |                                            |
| GSE21990                                 | Ernst <sup>84</sup> 2010                   |                                            |
| GSE34171                                 | Monti <sup>85</sup> 2012                   |                                            |
| GSE36908                                 | Edelmann <sup>86</sup> 2012                |                                            |
| Databases                                |                                            |                                            |
| Name                                     | Version                                    | 1 <sup>st</sup> Author <sup>ref</sup> year |
| GEO                                      | -                                          | Barret <sup>87</sup> 2013                  |
| HapMap                                   | Release 35                                 | Intern. HapMap Project <sup>88</sup>       |
| NCBI dbSNP                               | 138                                        | Sherry <sup>89</sup> 2001                  |
| COSMIC                                   | SV 2014-02-04                              | Forbes <sup>90</sup> 2015                  |
| COSMIC                                   | WGS 70                                     | Forbes <sup>91</sup> 2011                  |
| 1000G                                    | April 2012                                 | Abecasis <sup>92</sup> 2012                |
| NCI60                                    | 2015-06-08                                 | Abaan <sup>93</sup> 2013                   |
| ESP6500-SI                               | 2015-06-08                                 | Exome Seq. Project <sup>94</sup>           |
| ExAc                                     | 0.3                                        | Lek <sup>95</sup> 2016                     |
| ClinVar                                  | 2015-03-30                                 | Landrum <sup>96</sup> 2014                 |
| DGV                                      | GRCh37_hg19_variants_2013-07-23            | MacDonald <sup>97</sup> 2014               |
| lncRNAsv7                                | 2012-05-02                                 | Cabili <sup>98</sup> 2011                  |
| miRBase                                  | 20                                         | Kozomara <sup>99</sup> 2014                |
| FANTOM5                                  | Phase 1 & 2                                | Lizio <sup>100</sup> 2015                  |
| TCGASpliceSeq                            | Accessed: 2017-06-12                       | Ryan <sup>101</sup> 2016                   |
| Bioinformatic tools                      |                                            |                                            |
| Name                                     | Version                                    | 1 <sup>st</sup> Author <sup>ref</sup> year |
| ComBat / sva                             | 3.22.0                                     | Johnson <sup>40</sup> 2007                 |
| biomaRt                                  | 2.30.0                                     | Durinck <sup>41</sup> 2005                 |
| Bioconductor                             | 2.10                                       | Gentleman <sup>42</sup> 2004               |
| ConsensusPathDB                          | Release 32<br>(2017-01-11)                 | Kamburov <sup>43</sup> 2013                |
| Integrative Genome Viewer                | 2.3.23                                     | Thorvaldsdóttir <sup>44</sup> 2013         |
| GISTIC                                   | 2.0                                        | Mermel <sup>8</sup> 2011                   |
| bwa                                      | 0.6.2                                      | Li <sup>45</sup> 2009                      |
| MuSiC                                    | 0.4                                        | Dees <sup>46</sup> 2012                    |
| MuTect                                   | 1.14 / 2                                   | Cibulskis <sup>47</sup> 2013               |
| VarScan                                  | 2.3.6                                      | Koboldt <sup>48</sup> 2012                 |
| Genome Analysis Toolkit UnifiedGenotyper | 2.7-4                                      | McKenna <sup>49</sup> 2010                 |
| ANNOVAR                                  | 2015-12-14                                 | Wang <sup>50</sup> 2010                    |
| PROVEAN                                  | 1.1.5                                      | Choi <sup>51</sup> 2012                    |
| PolyPhen-2                               | 2                                          | Adzhubei <sup>15</sup> 2013                |
| SIFT2                                    | 2                                          | Kumar <sup>14</sup> 2009                   |
| Delly                                    | 0.7.2                                      | Rausch <sup>52</sup> 2012                  |



| Bioinformatic tools (continued)              |           |                                 |
|----------------------------------------------|-----------|---------------------------------|
| Circos                                       | 0.64      | Krzywinski <sup>53</sup> 2009   |
| MSIsensor                                    | 0.2       | Niu <sup>54</sup> 2014          |
| telseq                                       | 1.0       | Ding <sup>24</sup> 2014         |
| TopHat                                       | 2.0.10    | Trapnell <sup>55</sup> 2009     |
| DEXSeq                                       | 1.14.0    | Anders <sup>56</sup> 2010       |
| DESeq                                        | 1.16.0    | Anders <sup>57</sup> 2012       |
| TopHat-Fusion                                | 2.0.10    | Kim <sup>58</sup> 2011          |
| Oncofuse                                     | 1.0.9     | Shugay <sup>59</sup> 2013       |
| STAR/STAR-Fusion                             | 2.5.2a    | Dobin <sup>60</sup> 2013        |
| VirusFinder                                  | 2.0       | Wang <sup>61</sup> 2013         |
| PyClone                                      | 0.13.0    | Roth <sup>62</sup> 2014         |
| QuickNGS                                     | 1.24      | Wagle <sup>63</sup> 2015        |
| Ingenuity® Pathway Analysis                  | -         | Krämer <sup>64</sup> 2014       |
| Broad GSEA                                   | 2-2.2.1   | Subramanian <sup>1</sup> 2007   |
| STRINGdb                                     | 9.10      | Franceschini <sup>65</sup> 2013 |
| affy                                         | 1.52.0    | Gautier <sup>66</sup> 2004      |
| GenomicRanges                                | 1.16.4    | Lawrence <sup>67</sup> 2013     |
| mouseDivGeno                                 | 1.0.4     | Yang <sup>68</sup> 2009         |
| synergyfinder                                | 1.0       | lanevski <sup>69</sup> 2017     |
| SAMtools                                     | 0.1.19    | Li <sup>70</sup> 2009           |
| Picard Tools                                 | 1.88      | DePristo <sup>71</sup> 2011     |
| liftOver                                     | Linux-x64 | Kuhn <sup>72</sup> 2013         |
| EXCAVATOR2                                   | 1.1       | D'Aurizio <sup>73</sup>         |
| "Significance analysis of microarrays" (SAM) | -         | Tusher <sup>74</sup> 2001       |
| Linear regression                            | -         | Chen <sup>75</sup> 2001         |
| Tukey's median polish                        | -         | Tukey <sup>76</sup> 1977        |
| Circular binary segmentation (CBS)           | -         | Venkatraman <sup>77</sup> 2007  |
| Birdseed                                     | -         | Korn <sup>78</sup> 2008         |
| FoxoG filter                                 | -         | Costello <sup>9</sup> 2013      |
| Allelic imbalance filter                     | -         | Chen <sup>79</sup> 2017         |

731 **Supplementary Table 3: Small molecules and compounds**

732 Key information on the small-molecules and compounds used in this study.

733

| Name                   | Target             | 1 <sup>st</sup> Author <sup>ref</sup> year | Source          |
|------------------------|--------------------|--------------------------------------------|-----------------|
| Idasanutlin            | MDM2               | Ding <sup>102</sup> 2013                   | Hycultec        |
| Prima-1 <sup>met</sup> | p53                | Zandi <sup>103</sup> 2011                  | GENTAUR         |
| Panobinostat           | pan-HDACs          | Scuto <sup>104</sup> 2008                  | Hycultec        |
| KU55933                | ATM                | Li <sup>105</sup> 2010                     | Selleckchem     |
| Olaparib               | PARP               | Menear <sup>106</sup> 2008                 | Selleckchem     |
| Bendamustine           | DNA damage inducer | Leoni <sup>107</sup> 2008                  | Astellas Pharma |

734

735 **SUPPLEMENTARY REFERENCES**

- 736 1. Subramanian, A. *et al.* Gene set enrichment analysis: a knowledge-based  
737 approach for interpreting genome-wide expression profiles. *Proc. Natl. Acad.*  
738 *Sci. U. S. A.* **102**, 15545–50 (2005).
- 739 2. Mootha, V. K. *et al.* PGC-1alpha-responsive genes involved in oxidative  
740 phosphorylation are coordinately downregulated in human diabetes. *Nat.*  
741 *Genet.* **34**, 267–73 (2003).
- 742 3. Dürig, J. *et al.* Combined single nucleotide polymorphism-based genomic  
743 mapping and global gene expression profiling identifies novel chromosomal  
744 imbalances, mechanisms and candidate genes important in the pathogenesis  
745 of T-cell prolymphocytic leukemia with inv(14)(q11q32). *Leukemia* **21**, 2153–63  
746 (2007).
- 747 4. Schlosser, I. *et al.* Dissection of transcriptional programmes in response to  
748 serum and c-Myc in a human B-cell line. *Oncogene* **24**, 520–4 (2005).
- 749 5. Rashi-Elkeles, S. *et al.* Parallel induction of ATM-dependent pro- and  
750 antiapoptotic signals in response to ionizing radiation in murine lymphoid  
751 tissue. *Oncogene* **25**, 1584–92 (2006).
- 752 6. Jackson-Grusby, L. *et al.* Loss of genomic methylation causes p53-dependent  
753 apoptosis and epigenetic deregulation. *Nat. Genet.* **27**, 31–9 (2001).
- 754 7. Saitou, M., Sugimoto, J., Hatakeyama, T., Russo, G. & Isobe, M. Identification  
755 of the TCL6 genes within the breakpoint cluster region on chromosome 14q32  
756 in T-cell leukemia. *Oncogene* **19**, 2796–802 (2000).
- 757 8. Mermel, C. H. *et al.* GISTIC2.0 facilitates sensitive and confident localization of  
758 the targets of focal somatic copy-number alteration in human cancers. *Genome*  
759 *Biol.* **12**, R41 (2011).
- 760 9. Costello, M. *et al.* Discovery and characterization of artifactual mutations in  
761 deep coverage targeted capture sequencing data due to oxidative DNA  
762 damage during sample preparation. *Nucleic Acids Res.* **41**, e67 (2013).
- 763 10. Alexandrov, L. B. *et al.* Signatures of mutational processes in human cancer.  
764 *Nature* **500**, 415–21 (2013).
- 765 11. Herling, M. *et al.* High TCL1 expression and intact T-cell receptor signaling  
766 define a hyperproliferative subset of T-cell prolymphocytic leukemia. *Blood*  
767 **111**, 328–337 (2008).
- 768 12. Prinz, C. *et al.* Organometallic nucleosides induce non-classical leukemic cell  
769 death that is mitochondrial-ROS dependent and facilitated by TCL1-oncogene  
770 burden. *Mol. Cancer* **14**, 114 (2015).
- 771 13. De Bont, R. & van Larebeke, N. Endogenous DNA damage in humans: a  
772 review of quantitative data. *Mutagenesis* **19**, 169–85 (2004).
- 773 14. Kumar, P., Henikoff, S. & Ng, P. C. Predicting the effects of coding non-  
774 synonymous variants on protein function using the SIFT algorithm. *Nat. Protoc.*  
775 **4**, 1073–81 (2009).
- 776 15. Adzhubei, I., Jordan, D. M. & Sunyaev, S. R. Predicting functional effect of  
777 human missense mutations using PolyPhen-2. *Curr. Protoc. Hum. Genet.*  
778 **Chapter 7**, Unit7.20 (2013).

- 779 16. Kiel, M. J. *et al.* Integrated genomic sequencing reveals mutational landscape  
780 of T-cell prolymphocytic leukemia. *Blood* **124**(9), 1460–72 (2014).
- 781 17. Bradshaw, P., Condie, A. & Matutes, E. Breakpoints in the ataxia telangiectasia  
782 gene arise at the RGYW somatic hypermutation motif. *Oncogene* **58**, 483–487  
783 (2002).
- 784 18. Vořechovský, I. *et al.* Clustering of missense mutations in the ataxia-  
785 telangiectasia gene in a sporadic T-cell leukaemia. *Nat. Genet.* **17**, 96–99  
786 (1997).
- 787 19. Stilgenbauer, S. *et al.* Biallelic mutations in the ATM gene in T-prolymphocytic  
788 leukemia. *Nat. Med.* **3**, 1155–9 (1997).
- 789 20. Stengel, A. *et al.* Genetic characterization of T-PLL reveals two major biologic  
790 subgroups and JAK3 mutations as prognostic marker. *Genes Chromosom.*  
791 *Cancer* **55**, 82–94 (2016).
- 792 21. Sandoval, N. *et al.* Characterization of ATM gene mutations in 66 ataxia  
793 telangiectasia families. *Hum. Mol. Genet.* **8**, 69–79 (1999).
- 794 22. Weidner, C. I. *et al.* Aging of blood can be tracked by DNA methylation  
795 changes at just three CpG sites. *Genome Biol.* **15**, R24 (2014).
- 796 23. Röth, A. *et al.* Short telomeres and high telomerase activity in T-cell  
797 prolymphocytic leukemia. *Leukemia* **21**, 2456–62 (2007).
- 798 24. Ding, Z., Mangino, M., Aviv, A., Spector, T. & Durbin, R. Estimating telomere  
799 length from whole genome sequence data. *Nucleic Acids Res.* **42**, e75 (2014).
- 800 25. Delia, D. *et al.* ATM protein and p53-serine 15 phosphorylation in ataxia-  
801 telangiectasia (AT) patients and at heterozygotes. *Br. J. Cancer* **82**, 1938–45  
802 (2000).
- 803 26. Cawthon, R. M. Telomere length measurement by a novel monochrome  
804 multiplex quantitative PCR method. *Nucleic Acids Res.* **37**, e21 (2009).
- 805 27. Yamamoto, K. *et al.* Kinase-dead ATM protein is highly oncogenic and can be  
806 preferentially targeted by Topo-isomerase I inhibitors. *Elife* **5**, (2016).
- 807 28. Stoppa-Lyonnet, D. *et al.* Inactivation of the ATM gene in T-cell prolymphocytic  
808 leukemias. *Blood* **91**, 3920–6 (1998).
- 809 29. Hetet, G. *et al.* Recurrent molecular deletion of the 12p13 region, centromeric  
810 to ETV6/TEL, in T-cell prolymphocytic leukemia. *Hematol. J.* **1**, 42–7 (2000).
- 811 30. Matutes, E. *et al.* Clinical and laboratory features of 78 cases of T-  
812 prolymphocytic leukemia. *Blood* **78**, 3269–74 (1991).
- 813 31. Bellanger, D. *et al.* Recurrent JAK1 and JAK3 somatic mutations in T-cell  
814 prolymphocytic leukemia. *Leukemia* **28**, 417–9 (2014).
- 815 32. Bergmann, A. K. *et al.* Recurrent mutation of JAK3 in T-cell prolymphocytic  
816 leukemia. *Genes. Chromosomes Cancer* **53**, 309–16 (2014).
- 817 33. Soulier, J. *et al.* A complex pattern of recurrent chromosomal losses and gains  
818 in T-cell prolymphocytic leukemia. *Genes. Chromosomes Cancer* **31**, 248–254  
819 (2001).
- 820 34. Le Torielléc, E. *et al.* Haploinsufficiency of CDKN1B contributes to  
821 leukemogenesis in T-cell prolymphocytic leukemia. *Blood* **111**, 2321–2328  
822 (2008).
- 823

- 824 35. Bug, S. *et al.* Recurrent loss, but lack of mutations, of the SMARCB1 tumor  
825 suppressor gene in T-cell prolymphocytic leukemia with TCL1A-TCRAD  
826 juxtaposition. *Cancer Genet. Cytogenet.* **192**, 44–7 (2009).
- 827 36. Delgado, P., Starshak, P., Rao, N. & Tirado, C. A. A Comprehensive Update  
828 on Molecular and Cytogenetic Abnormalities in T-cell Prolymphocytic Leukemia  
829 (T-PLL). *J. Assoc. Genet. Technol.* **38**, 193–8 (2012).
- 830 37. Hsi, A. C. *et al.* T-cell prolymphocytic leukemia frequently shows cutaneous  
831 involvement and is associated with gains of MYC, loss of ATM, and TCL1A  
832 rearrangement. *Am. J. Surg. Pathol.* **38**, 1468–83 (2014).
- 833 38. Lopez, C. *et al.* Genes encoding members of the JAK-STAT pathway or  
834 epigenetic regulators are recurrently mutated in T-cell prolymphocytic  
835 leukaemia. *Br. J. Haematol.* **173**, 265–273 (2016).
- 836 39. Hu, Z. *et al.* Prognostic significance of cytogenetic abnormalities in T-cell  
837 prolymphocytic leukemia. *Am. J. Hematol.* **92**, 441–447 (2017).
- 838 40. Johnson, W. E., Li, C. & Rabinovic, A. Adjusting batch effects in microarray  
839 expression data using empirical Bayes methods. *Biostatistics* **8**, 118–27  
840 (2007).
- 841 41. Durinck, S. *et al.* BioMart and Bioconductor: a powerful link between biological  
842 databases and microarray data analysis. *Bioinformatics* **21**, 3439–40 (2005).
- 843 42. Gentleman, R. C. *et al.* Bioconductor: open software development for  
844 computational biology and bioinformatics. *Genome Biol.* **5**, R80 (2004).
- 845 43. Kamburov, A., Stelzl, U., Lehrach, H. & Herwig, R. The ConsensusPathDB  
846 interaction database: 2013 update. *Nucleic Acids Res.* **41**, D793-800 (2013).
- 847 44. Thorvaldsdóttir, H., Robinson, J. T. & Mesirov, J. P. Integrative Genomics  
848 Viewer (IGV): high-performance genomics data visualization and exploration.  
849 *Brief. Bioinform.* **14**, 178–92 (2013).
- 850 45. Li, H. & Durbin, R. Fast and accurate short read alignment with Burrows-  
851 Wheeler transform. *Bioinformatics* **25**, 1754–60 (2009).
- 852 46. Dees, N. D. *et al.* MuSiC: identifying mutational significance in cancer  
853 genomes. *Genome Res.* **22**, 1589–98 (2012).
- 854 47. Cibulskis, K. *et al.* Sensitive detection of somatic point mutations in impure and  
855 heterogeneous cancer samples. *Nat. Biotechnol.* **31**, 213–9 (2013).
- 856 48. Koboldt, D. C. *et al.* VarScan 2: somatic mutation and copy number alteration  
857 discovery in cancer by exome sequencing. *Genome Res.* **22**, 568–76 (2012).
- 858 49. McKenna, A. *et al.* The Genome Analysis Toolkit: a MapReduce framework for  
859 analyzing next-generation DNA sequencing data. *Genome Res.* **20**, 1297–303  
860 (2010).
- 861 50. Wang, K., Li, M. & Hakonarson, H. ANNOVAR: functional annotation of genetic  
862 variants from high-throughput sequencing data. *Nucleic Acids Res.* **38**, e164  
863 (2010).
- 864 51. Choi, Y., Sims, G. E., Murphy, S., Miller, J. R. & Chan, A. P. Predicting the  
865 functional effect of amino acid substitutions and indels. *PLoS One* **7**, e46688  
866 (2012).
- 867 52. Rausch, T. *et al.* DELLY: structural variant discovery by integrated paired-end  
868 and split-read analysis. *Bioinformatics* **28**, i333–i339 (2012).

- 869 53. Krzywinski, M. *et al.* Circos: an information aesthetic for comparative genomics.  
870 *Genome Res.* **19**, 1639–45 (2009).
- 871 54. Niu, B. *et al.* MSIsensor: microsatellite instability detection using paired tumor-  
872 normal sequence data. *Bioinformatics* **30**, 1015–6 (2014).
- 873 55. Trapnell, C., Pachter, L. & Salzberg, S. L. TopHat: discovering splice junctions  
874 with RNA-Seq. *Bioinformatics* **25**, 1105–11 (2009).
- 875 56. Anders, S. & Huber, W. Differential expression analysis for sequence count  
876 data. *Genome Biol.* **11**, R106 (2010).
- 877 57. Anders, S., Reyes, A. & Huber, W. Detecting differential usage of exons from  
878 RNA-seq data. *Genome Res.* **22**, 2008–17 (2012).
- 879 58. Kim, D. & Salzberg, S. L. TopHat-Fusion: an algorithm for discovery of novel  
880 fusion transcripts. *Genome Biol.* **12**, R72 (2011).
- 881 59. Shugay, M., Ortiz de Mendíbil, I., Vizmanos, J. L. & Novo, F. J. Oncofuse: a  
882 computational framework for the prediction of the oncogenic potential of gene  
883 fusions. *Bioinformatics* **29**, 2539–46 (2013).
- 884 60. Dobin, A. *et al.* STAR: ultrafast universal RNA-seq aligner. *Bioinformatics* **29**,  
885 15–21 (2013).
- 886 61. Wang, Q., Jia, P. & Zhao, Z. VirusFinder: software for efficient and accurate  
887 detection of viruses and their integration sites in host genomes through next  
888 generation sequencing data. *PLoS One* **8**, e64465 (2013).
- 889 62. Roth, A. *et al.* PyClone: statistical inference of clonal population structure in  
890 cancer. *Nat. Methods* **11**, 396–398 (2014).
- 891 63. Wagle, P., Nikolić, M. & Frommolt, P. QuickNGS elevates Next-Generation  
892 Sequencing data analysis to a new level of automation. *BMC Genomics* **16**,  
893 487 (2015).
- 894 64. Krämer, A., Green, J., Pollard, J. & Tugendreich, S. Causal analysis  
895 approaches in Ingenuity Pathway Analysis. *Bioinformatics* **30**, 523–530 (2014).
- 896 65. Franceschini, A. *et al.* STRING v9.1: protein-protein interaction networks, with  
897 increased coverage and integration. *Nucleic Acids Res.* **41**, D808-15 (2013).
- 898 66. Gautier, L., Cope, L., Bolstad, B. M. & Irizarry, R. A. affy--analysis of Affymetrix  
899 GeneChip data at the probe level. *Bioinformatics* **20**, 307–15 (2004).
- 900 67. Lawrence, M. S. *et al.* Mutational heterogeneity in cancer and the search for  
901 new cancer-associated genes. *Nature* **499**, 214–8 (2013).
- 902 68. Yang, H. *et al.* A customized and versatile high-density genotyping array for the  
903 mouse. *Nat. Methods* **6**, 663–6 (2009).
- 904 69. Ianevski, A., He, L., Aittokallio, T. & Tang, J. SynergyFinder: a web application  
905 for analyzing drug combination dose–response matrix data. *Bioinformatics*  
906 (2017). doi:10.1093/bioinformatics/btx162
- 907 70. Li, H. *et al.* The Sequence Alignment/Map format and SAMtools. *Bioinformatics*  
908 **25**, 2078–2079 (2009).
- 909 71. DePristo, M. A. *et al.* A framework for variation discovery and genotyping using  
910 next-generation DNA sequencing data. *Nat. Genet.* **43**, 491–8 (2011).
- 911 72. Kuhn, R. M., Haussler, D. & Kent, W. J. The UCSC genome browser and  
912 associated tools. *Brief. Bioinform.* **14**, 144–161 (2013).
- 913

- 914 73. D'Aurizio, R. *et al.* Enhanced copy number variants detection from whole-  
 915 exome sequencing data using EXCAVATOR2. *Nucleic Acids Res.* **44**, e154  
 916 (2016).
- 917 74. Tusher, V. G., Tibshirani, R. & Chu, G. Significance analysis of microarrays  
 918 applied to the ionizing radiation response. *Proc. Natl. Acad. Sci. U. S. A.* **98**,  
 919 5116–21 (2001).
- 920 75. Chen, K. Generalized case-cohort sampling. *J. R. Stat. Soc. Ser. B (Statistical*  
 921 *Methodol.* **63**, 791–809 (2001).
- 922 76. Tukey, J. W. *Exploratory Data Analysis.* (Addison-Wesley, 1977).
- 923 77. Venkatraman, E. S. & Olshen, A. B. A faster circular binary segmentation  
 924 algorithm for the analysis of array CGH data. *Bioinformatics* **23**, 657–63 (2007).
- 925 78. Korn, J. M. *et al.* Integrated genotype calling and association analysis of SNPs,  
 926 common copy number polymorphisms and rare CNVs. *Nat. Genet.* **40**, 1253–  
 927 60 (2008).
- 928 79. Chen, L., Liu, P., Evans, T. C. & Ettwiller, L. M. DNA damage is a pervasive  
 929 cause of sequencing errors, directly confounding variant identification. *Science*  
 930 (80-. ). **355**, 752–756 (2017).
- 931 80. Wilkerson, M. D. *et al.* Differential pathogenesis of lung adenocarcinoma  
 932 subtypes involving sequence mutations, copy number, chromosomal instability,  
 933 and methylation. *PLoS One* **7**, e36530 (2012).
- 934 81. Weiss, J. *et al.* Frequent and focal FGFR1 amplification associates with  
 935 therapeutically tractable FGFR1 dependency in squamous cell lung cancer.  
 936 *Sci. Transl. Med.* **2**, 62ra93 (2010).
- 937 82. Boi, M. *et al.* PRDM1/BLIMP1 is commonly inactivated in anaplastic large T-cell  
 938 lymphoma. *Blood* **122**, 2683–93 (2013).
- 939 83. Parkin, B. *et al.* Acquired genomic copy number aberrations and survival in  
 940 adult acute myelogenous leukemia. *Blood* **116**, 4958–67 (2010).
- 941 84. Ernst, T. *et al.* Inactivating mutations of the histone methyltransferase gene  
 942 EZH2 in myeloid disorders. *Nat. Genet.* **42**, 722–6 (2010).
- 943 85. Monti, S. *et al.* Integrative analysis reveals an outcome-associated and  
 944 targetable pattern of p53 and cell cycle deregulation in diffuse large B cell  
 945 lymphoma. *Cancer Cell* **22**, 359–72 (2012).
- 946 86. Edelmann, J. *et al.* High-resolution genomic profiling of chronic lymphocytic  
 947 leukemia reveals new recurrent genomic alterations. *Blood* **120**, 4783–94  
 948 (2012).
- 949 87. Barrett, T. *et al.* NCBI GEO: archive for functional genomics data sets--update.  
 950 *Nucleic Acids Res.* **41**, D991-5 (2013).
- 951 88. The International HapMap Project. *Nature* **426**, 789–96 (2003).
- 952 89. Sherry, S. T. *et al.* dbSNP: the NCBI database of genetic variation. *Nucleic*  
 953 *Acids Res.* **29**, 308–11 (2001).
- 954 90. Forbes, S. A. *et al.* COSMIC: exploring the world's knowledge of somatic  
 955 mutations in human cancer. *Nucleic Acids Res.* **43**, D805–D811 (2015).
- 956 91. Forbes, S. A. *et al.* COSMIC: mining complete cancer genomes in the  
 957 Catalogue of Somatic Mutations in Cancer. *Nucleic Acids Res.* **39**, D945-50  
 958 (2011).

- 959 92. Abecasis, G. R. *et al.* An integrated map of genetic variation from 1,092 human  
960 genomes. *Nature* **491**, 56–65 (2012).
- 961 93. Abaan, O. D. *et al.* The exomes of the NCI-60 panel: a genomic resource for  
962 cancer biology and systems pharmacology. *Cancer Res.* **73**, 4372–82 (2013).
- 963 94. Exome Variant Server. NHLBI Exome Sequencing Project (ESP). *Seattle, WA*  
964 *Retrieved June, 2015, from <http://evs.gs.washington.edu/EVS/>*
- 965 95. Lek, M. *et al.* Analysis of protein-coding genetic variation in 60,706 humans.  
966 *Nature* **536**, 285–291 (2016).
- 967 96. Landrum, M. J. *et al.* ClinVar: public archive of relationships among sequence  
968 variation and human phenotype. *Nucleic Acids Res.* **42**, D980-5 (2014).
- 969 97. MacDonald, J. R., Ziman, R., Yuen, R. K. C., Feuk, L. & Scherer, S. W. The  
970 Database of Genomic Variants: a curated collection of structural variation in the  
971 human genome. *Nucleic Acids Res.* **42**, D986-92 (2014).
- 972 98. Cabili, M. N. *et al.* Integrative annotation of human large intergenic noncoding  
973 RNAs reveals global properties and specific subclasses. *Genes Dev.* **25**,  
974 1915–27 (2011).
- 975 99. Kozomara, A. & Griffiths-Jones, S. miRBase: annotating high confidence  
976 microRNAs using deep sequencing data. *Nucleic Acids Res.* **42**, D68-73  
977 (2014).
- 978 100. Lizio, M. *et al.* Gateways to the FANTOM5 promoter level mammalian  
979 expression atlas. *Genome Biol.* **16**, 22 (2015).
- 980 101. Ryan, M. *et al.* TCGASpliceSeq a compendium of alternative mRNA splicing in  
981 cancer. *Nucleic Acids Res.* **44**, D1018-22 (2016).
- 982 102. Ding, Q. *et al.* Discovery of RG7388, a Potent and Selective p53–MDM2  
983 Inhibitor in Clinical Development. *J. Med. Chem.* **56**, 5979–5983 (2013).
- 984 103. Zandi, R. *et al.* PRIMA-1Met/APR-246 induces apoptosis and tumor growth  
985 delay in small cell lung cancer expressing mutant p53. *Clin. Cancer Res.* **17**,  
986 2830–41 (2011).
- 987 104. Scuto, A. *et al.* The novel histone deacetylase inhibitor, LBH589, induces  
988 expression of DNA damage response genes and apoptosis in Ph- acute  
989 lymphoblastic leukemia cells. *Blood* **111**, 5093–100 (2008).
- 990 105. Li, Y. & Yang, D.-Q. The ATM inhibitor KU-55933 suppresses cell proliferation  
991 and induces apoptosis by blocking Akt in cancer cells with overactivated Akt.  
992 *Mol. Cancer Ther.* **9**, 113–25 (2010).
- 993 106. Menear, K. A. *et al.* 4-[3-(4-cyclopropanecarbonylpiperazine-1-carbonyl)-4-  
994 fluorobenzyl]-2H-phthalazin-1-one: a novel bioavailable inhibitor of poly(ADP-  
995 ribose) polymerase-1. *J. Med. Chem.* **51**, 6581–91 (2008).
- 996 107. Leoni, L. M. *et al.* Bendamustine (Treanda) displays a distinct pattern of  
997 cytotoxicity and unique mechanistic features compared with other alkylating  
998 agents. *Clin. Cancer Res.* **14**, 309–17 (2008).
- 999
